# Supplementary material for: The oxygen deficiency index blueprint allows an economic and quick scan via baseline assessment for forecasting the risk of seasonal oxygen deficiency in the North and Baltic Seas
Source: Copernicus journal article supplement (doi:10.5194/egusphere-2023-3092), 2024-01-17
Supplement: Supplementary file 1 [file egusphere-2023-3092-supplement.pdf]

## The oxygen deficiency index blueprint allows an economic and quick scan via baseline assessment for forecasting the risk of seasonal oxygen deficiency in the North and Baltic Seas

5 Authors: Alexandra Marki<sup>1</sup>, Xin Li<sup>1</sup>, Simon Jandt-Scheelke<sup>1</sup>,

<sup>1</sup>Federal Maritime and Hydrographic Agency (BSH), Bernhard-Nocht-Str. 78, 20359 Hamburg, Germany

Correspondence to: Alexandra Marki (alexandra.marki@bsh.de)

The following equations were tested with different weighing and consider the effects of stratification and NPP. Higher weights set more focus on the subindex, with the aim to impose higher impacts on the environment to developing ODZs. Each of the index was thoroughly tested with the same methods as the ODI33rev shown in the main manuscript. Additional information not included in the main manuscript can be found in the Tables and Figures below. We include a selection of sensor 2 data comparisons at each station, which has experienced the same procedures as sensor 1 measurements. Sensor 2 was not taken into consideration, since no sufficient data were available for analysis at each station (Marnet, 2018-2023).

### Supplementary equations:

$$ODI_{half}(x, y, t_0) = \Sigma \left( \frac{1}{2} I_{depth}(x, y, t_0), \frac{1}{2} I_{NPP}(x, y, t_0) \right) * I_{strat}(x, y, t_0), \quad (\text{equ s1})$$

$$ODI_{25}(x, y, t_0) = \Sigma \left( \frac{1}{4} I_{depth}(x, y, t_0), \frac{3}{4} I_{NPP}(x, y, t_0) \right) * I_{strat}(x, y, t_0), \quad (\text{equ s2})$$

$$ODI_{33}(x, y, t_0) = \Sigma \left( \frac{2}{3} I_{depth}(x, y, t_0), \frac{1}{3} I_{NPP}(x, y, t_0) \right) * I_{strat}(x, y, t_0), \quad (\text{equ s3})$$

We also tested a seasonal version of the  $I_{NPP}$ , where we  $t_{seas}$  lasts from 1st April to 30 th September (184 days). Here we extracted the minimum (min) and maximum (max) values each year of every  $t_{seas}$ . The mean of the NPP is given by our  $\overline{NPP}$  of our reference period of 30 days, simply because  $I_{NPP}(t_{seas})$  would be always the same within the arch of the running simulation year, if we would use  $\overline{NPP}(t_{seas})$ .

$$I_{NPP}(t_{seas}) = \max \left( 0, \min \left( 1, \frac{\overline{NPP} - NPP_{min}}{NPP_{max} - NPP_{min}} \right) \right) \quad (\text{equ s4})$$

And we also tested for a generic version of the  $I_{NPP}$ , with fixed min and max values ( $\min(INPP) = 25$ ,  $\max(INPP)=135$ )

The mean of the NPP is given by our  $\overline{NPP}$  of our reference period of 30 days, simply because  $I_{NPP}(t_{fix})$  would be always the same within the arch of the running simulation year(s), if we would use  $\overline{NPP}(t_{fix})$ .

$$I_{NPP}(t_{fix}) = \max \left( 0, \min \left( 1, \frac{\overline{NPP} - NPP_{fmin}}{NPP_{fmax} - NPP_{fmin}} \right) \right) \quad (\text{equ s5})$$

## Supplementary tables and figures

Supplement Table 1: Monitoring Platforms/Stations in the North and Baltic Seas and both sensor depths, (Marnet, 2018-2023).

| Station | Latitude | Longitude | Platform Name                   | Region     | Depth s1<br>(sensor 1) | Depth s2<br>(sensor 2) |
|---------|----------|-----------|---------------------------------|------------|------------------------|------------------------|
| MePDS   | 12.7°E   | 54.7°N    | Measuring Pile Darss Sill       | Baltic Sea | 19 m                   | 19 m                   |
| ArkBB   | 13.867°E | 54.883°N  | Arkona Basin Buoy               | Baltic Sea | 40 m                   | 40 m                   |
| FehBB   | 11.15°E  | 54.6°N    | Fehmarn Belt Buoy               | Baltic Sea | 24 m                   | 24 m                   |
| KielLH  | 10.267°E | 54.5°N    | Kiel Lighthouse                 | Baltic Sea | 13 m                   | na                     |
| FinoPF1 | 6.583°E  | 54°N      | FINO1 Platform                  | North Sea  | 25 m                   | na                     |
| FinoPF3 | 7.158°E  | 55.195°N  | FINO3 Platform                  | North Sea  | 18 m                   | na                     |
| NSBII   | 6.333°E  | 55°N      | North Sea Buoy II               | North Sea  | 35 m                   | 35 m                   |
| NSBIII  | 6.783°E  | 54.683°N  | North Sea Buoy III              | North Sea  | 35 m                   | 35 m                   |
| TWEms   | 6.35°E   | 54.167°N  | Unmanned Lightship TW Ems       | North Sea  | 30 m                   | 30 m                   |
| GB      | 7.45°E   | 54.1667°N | Unmanned Lightship German Bight | North Sea  | 30 m                   | 30 m                   |

35

Supplement Table 2: Sensor 1 – Correlation coefficients ODI vs Observations, at each station, and all lags, (Marnet, 2018-2023).

| Station<br>(sensor 1) | ODI      | lag0  | lag5  | lag10 | lag15 | lag30        | lag45        | lag60        | lag75        | lag90        | lag105       | lag120 |
|-----------------------|----------|-------|-------|-------|-------|--------------|--------------|--------------|--------------|--------------|--------------|--------|
| MePDS                 | ODI33rev | -0.32 | -0.31 | -0.30 | -0.32 | -0.36        | -0.47        | -0.50        | <b>-0.51</b> | -0.44        | -0.32        | -0.12  |
| ArkBB                 | ODI33rev | 0.16  | 0.09  | 0.03  | -0.02 | -0.06        | -0.06        | -0.09        | -0.18        | <b>-0.28</b> | <b>-0.29</b> | -0.20  |
| FehBB                 | ODI33rev | -0.35 | -0.36 | -0.37 | -0.38 | -0.43        | -0.48        | <b>-0.54</b> | -0.53        | -0.50        | -0.43        | -0.32  |
| KielLH                | ODI33rev | -0.39 | -0.45 | -0.51 | -0.55 | -0.62        | -0.66        | <b>-0.70</b> | -0.69        | -0.57        | -0.40        | -0.23  |
| FinoPF1               | ODI33rev | -0.06 | -0.12 | -0.12 | -0.16 | -0.11        | -0.13        | -0.11        | -0.09        | <b>-0.23</b> | -0.13        | 0.01   |
| FinoPF3               | ODI33rev | -0.32 | -0.30 | -0.28 | -0.25 | -0.33        | <b>-0.40</b> | -0.35        | -0.24        | -0.05        | 0.13         | 0.20   |
| NSBII                 | ODI33rev | -0.64 | -0.66 | -0.70 | -0.71 | -0.73        | <b>-0.72</b> | -0.61        | -0.49        | -0.35        | -0.17        | 0.03   |
| NSBIII                | ODI33rev | -0.47 | -0.50 | -0.52 | -0.52 | <b>-0.58</b> | -0.57        | <b>-0.58</b> | -0.53        | -0.38        | -0.23        | -0.08  |
| TWEms                 | ODI33rev | -0.35 | -0.39 | -0.38 | -0.35 | -0.33        | -0.39        | <b>-0.41</b> | -0.39        | -0.35        | -0.14        | 0.01   |
| GB                    | ODI33rev | -0.48 | -0.49 | -0.49 | -0.50 | <b>-0.53</b> | -0.51        | -0.48        | -0.38        | -0.17        | 0.06         | 0.18   |

Supplement Table 3: Sensor 1 – Correlation coefficients ODI vs Observations, at each station, and all lags, (Marnet, 2018-2023).

| Station<br>(sensor 1) | ODI         | lag0  | lag5  | lag10 | lag15 | lag30 | lag45 | lag60 | lag75 | lag90 | lag105 | lag120 |
|-----------------------|-------------|-------|-------|-------|-------|-------|-------|-------|-------|-------|--------|--------|
| ArkBB                 | fixODI25    | -0.24 | -0.28 | -0.33 | -0.38 | -0.46 | -0.47 | -0.44 | -0.37 | -0.25 | -0.07  | 0.13   |
| FehBB                 | fixODI25    | -0.76 | -0.75 | -0.73 | -0.71 | -0.64 | -0.52 | -0.35 | -0.17 | -0.01 | 0.12   | 0.25   |
| FinoPF1               | fixODI25    | -0.13 | -0.14 | -0.12 | -0.13 | -0.12 | -0.12 | -0.09 | -0.08 | -0.18 | -0.13  | -0.04  |
| FinoPF3               | fixODI25    | -0.50 | -0.48 | -0.44 | -0.40 | -0.37 | -0.32 | -0.18 | -0.04 | 0.10  | 0.20   | 0.24   |
| GB                    | fixODI25    | -0.70 | -0.69 | -0.67 | -0.64 | -0.59 | -0.47 | -0.35 | -0.21 | -0.02 | 0.17   | 0.27   |
| KielLH                | fixODI25    | -0.62 | -0.66 | -0.68 | -0.70 | -0.73 | -0.69 | -0.62 | -0.49 | -0.32 | -0.12  | 0.05   |
| MePDS                 | fixODI25    | -0.65 | -0.64 | -0.63 | -0.63 | -0.62 | -0.56 | -0.44 | -0.27 | -0.12 | 0.04   | 0.20   |
| NSBII                 | fixODI25    | -0.72 | -0.72 | -0.74 | -0.73 | -0.70 | -0.63 | -0.48 | -0.30 | -0.13 | 0.04   | 0.21   |
| NSBIII                | fixODI25    | -0.54 | -0.55 | -0.55 | -0.55 | -0.60 | -0.54 | -0.49 | -0.40 | -0.23 | -0.06  | 0.05   |
| TWEms                 | fixODI25    | -0.60 | -0.59 | -0.55 | -0.51 | -0.39 | -0.35 | -0.31 | -0.19 | -0.15 | -0.08  | -0.01  |
| ArkBB                 | fixODI33    | -0.05 | 0.00  | 0.04  | 0.05  | 0.10  | 0.13  | 0.20  | 0.28  | 0.31  | 0.35   | 0.40   |
| FehBB                 | fixODI33    | -0.63 | -0.62 | -0.60 | -0.58 | -0.52 | -0.44 | -0.37 | -0.26 | -0.16 | -0.06  | 0.08   |
| FinoPF1               | fixODI33    | -0.13 | -0.14 | -0.12 | -0.13 | -0.12 | -0.12 | -0.09 | -0.08 | -0.18 | -0.13  | -0.04  |
| FinoPF3               | fixODI33    | -0.36 | -0.33 | -0.30 | -0.26 | -0.24 | -0.21 | -0.13 | -0.06 | 0.04  | 0.18   | 0.27   |
| GB                    | fixODI33    | -0.68 | -0.66 | -0.64 | -0.62 | -0.62 | -0.54 | -0.40 | -0.19 | 0.03  | 0.20   | 0.28   |
| KielLH                | fixODI33    | -0.55 | -0.58 | -0.61 | -0.63 | -0.69 | -0.70 | -0.64 | -0.52 | -0.36 | -0.18  | -0.02  |
| MePDS                 | fixODI33    | -0.49 | -0.45 | -0.42 | -0.41 | -0.39 | -0.39 | -0.36 | -0.27 | -0.19 | -0.09  | 0.07   |
| NSBII                 | fixODI33    | -0.72 | -0.74 | -0.77 | -0.77 | -0.76 | -0.69 | -0.54 | -0.35 | -0.16 | 0.06   | 0.28   |
| NSBIII                | fixODI33    | -0.59 | -0.60 | -0.59 | -0.58 | -0.64 | -0.60 | -0.55 | -0.45 | -0.28 | -0.07  | 0.08   |
| TWEms                 | fixODI33    | -0.61 | -0.59 | -0.54 | -0.49 | -0.37 | -0.32 | -0.29 | -0.21 | -0.16 | -0.04  | 0.02   |
| ArkBB                 | fixODI33rev | -0.23 | -0.26 | -0.30 | -0.35 | -0.41 | -0.42 | -0.39 | -0.31 | -0.19 | -0.02  | 0.17   |
| FehBB                 | fixODI33rev | -0.75 | -0.73 | -0.72 | -0.70 | -0.63 | -0.51 | -0.36 | -0.19 | -0.04 | 0.08   | 0.22   |
| FinoPF1               | fixODI33rev | -0.13 | -0.14 | -0.12 | -0.13 | -0.12 | -0.12 | -0.09 | -0.08 | -0.18 | -0.13  | -0.04  |
| FinoPF3               | fixODI33rev | -0.48 | -0.46 | -0.42 | -0.38 | -0.35 | -0.30 | -0.17 | -0.04 | 0.09  | 0.20   | 0.25   |
| GB                    | fixODI33rev | -0.70 | -0.69 | -0.66 | -0.64 | -0.60 | -0.49 | -0.36 | -0.21 | -0.01 | 0.18   | 0.27   |
| KielLH                | fixODI33rev | -0.61 | -0.64 | -0.67 | -0.69 | -0.72 | -0.70 | -0.63 | -0.51 | -0.33 | -0.14  | 0.03   |
| MePDS                 | fixODI33rev | -0.62 | -0.61 | -0.59 | -0.59 | -0.58 | -0.54 | -0.43 | -0.28 | -0.14 | 0.01   | 0.17   |
| NSBII                 | fixODI33rev | -0.72 | -0.73 | -0.75 | -0.74 | -0.71 | -0.64 | -0.49 | -0.31 | -0.14 | 0.04   | 0.22   |
| NSBIII                | fixODI33rev | -0.55 | -0.56 | -0.55 | -0.55 | -0.61 | -0.55 | -0.50 | -0.41 | -0.24 | -0.06  | 0.06   |
| TWEms                 | fixODI33rev | -0.60 | -0.59 | -0.55 | -0.51 | -0.39 | -0.35 | -0.31 | -0.19 | -0.15 | -0.07  | -0.00  |
| ArkBB                 | fixODIhalf  | -0.18 | -0.18 | -0.19 | -0.22 | -0.25 | -0.24 | -0.19 | -0.10 | -0.00 | 0.14   | 0.28   |
| FehBB                 | fixODIhalf  | -0.70 | -0.69 | -0.67 | -0.65 | -0.58 | -0.49 | -0.37 | -0.23 | -0.10 | 0.01   | 0.15   |
| FinoPF1               | fixODIhalf  | -0.13 | -0.14 | -0.12 | -0.13 | -0.12 | -0.12 | -0.09 | -0.08 | -0.18 | -0.13  | -0.04  |
| FinoPF3               | fixODIhalf  | -0.42 | -0.40 | -0.37 | -0.33 | -0.30 | -0.26 | -0.15 | -0.05 | 0.07  | 0.19   | 0.26   |
| GB                    | fixODIhalf  | -0.70 | -0.68 | -0.66 | -0.64 | -0.61 | -0.51 | -0.38 | -0.20 | 0.01  | 0.19   | 0.28   |
| KielLH                | fixODIhalf  | -0.58 | -0.61 | -0.64 | -0.66 | -0.71 | -0.70 | -0.64 | -0.52 | -0.35 | -0.16  | -0.00  |
| MePDS                 | fixODIhalf  | -0.56 | -0.53 | -0.50 | -0.50 | -0.48 | -0.47 | -0.40 | -0.28 | -0.17 | -0.05  | 0.12   |
| NSBII                 | fixODIhalf  | -0.72 | -0.74 | -0.76 | -0.76 | -0.73 | -0.67 | -0.51 | -0.33 | -0.15 | 0.05   | 0.25   |
| NSBIII                | fixODIhalf  | -0.57 | -0.58 | -0.57 | -0.57 | -0.63 | -0.58 | -0.52 | -0.43 | -0.25 | -0.06  | 0.07   |
| TWEms                 | fixODIhalf  | -0.61 | -0.59 | -0.55 | -0.50 | -0.38 | -0.34 | -0.31 | -0.20 | -0.15 | -0.06  | 0.01   |
| ArkBB                 | ODI25       | 0.15  | 0.08  | 0.01  | -0.05 | -0.09 | -0.10 | -0.13 | -0.22 | -0.31 | -0.31  | -0.22  |
| FehBB                 | ODI25       | -0.30 | -0.31 | -0.33 | -0.34 | -0.41 | -0.47 | -0.53 | -0.54 | -0.52 | -0.45  | -0.35  |
| FinoPF1               | ODI25       | -0.06 | -0.12 | -0.12 | -0.16 | -0.11 | -0.13 | -0.11 | -0.09 | -0.23 | -0.13  | 0.01   |
| FinoPF3               | ODI25       | -0.32 | -0.31 | -0.29 | -0.26 | -0.35 | -0.42 | -0.37 | -0.25 | -0.05 | 0.13   | 0.19   |
| GB                    | ODI25       | -0.46 | -0.47 | -0.47 | -0.48 | -0.51 | -0.49 | -0.48 | -0.40 | -0.19 | 0.04   | 0.17   |
| KielLH                | ODI25       | -0.36 | -0.42 | -0.48 | -0.53 | -0.60 | -0.64 | -0.69 | -0.70 | -0.59 | -0.42  | -0.26  |

|         |           |       |       |       |       |       |       |       |       |       |       |       |
|---------|-----------|-------|-------|-------|-------|-------|-------|-------|-------|-------|-------|-------|
| MePDS   | ODI25     | -0.29 | -0.28 | -0.29 | -0.31 | -0.37 | -0.48 | -0.51 | -0.53 | -0.46 | -0.33 | -0.14 |
| NSBII   | ODI25     | -0.63 | -0.66 | -0.68 | -0.70 | -0.72 | -0.71 | -0.61 | -0.50 | -0.36 | -0.19 | 0.00  |
| NSBIII  | ODI25     | -0.45 | -0.49 | -0.50 | -0.51 | -0.57 | -0.55 | -0.57 | -0.52 | -0.37 | -0.24 | -0.10 |
| TWEms   | ODI25     | -0.33 | -0.38 | -0.37 | -0.34 | -0.33 | -0.39 | -0.42 | -0.35 | -0.35 | -0.15 | 0.01  |
| ArkBB   | ODI25a    | 0.15  | 0.08  | 0.01  | -0.05 | -0.09 | -0.10 | -0.13 | -0.22 | -0.31 | -0.31 | -0.22 |
| FehBB   | ODI25a    | -0.30 | -0.31 | -0.33 | -0.34 | -0.41 | -0.47 | -0.53 | -0.54 | -0.52 | -0.45 | -0.35 |
| FinoPF1 | ODI25a    | -0.06 | -0.12 | -0.12 | -0.16 | -0.11 | -0.13 | -0.11 | -0.09 | -0.23 | -0.13 | 0.01  |
| FinoPF3 | ODI25a    | -0.32 | -0.31 | -0.29 | -0.26 | -0.35 | -0.42 | -0.37 | -0.25 | -0.05 | 0.13  | 0.19  |
| GB      | ODI25a    | -0.46 | -0.47 | -0.47 | -0.48 | -0.51 | -0.49 | -0.48 | -0.40 | -0.19 | 0.04  | 0.17  |
| MePDS   | ODI25a    | -0.29 | -0.28 | -0.29 | -0.31 | -0.37 | -0.48 | -0.51 | -0.53 | -0.46 | -0.33 | -0.14 |
| NSBII   | ODI25a    | -0.63 | -0.66 | -0.68 | -0.70 | -0.72 | -0.71 | -0.61 | -0.50 | -0.36 | -0.19 | 0.00  |
| NSBIII  | ODI25a    | -0.45 | -0.49 | -0.50 | -0.51 | -0.57 | -0.55 | -0.57 | -0.52 | -0.37 | -0.24 | -0.10 |
| TWEms   | ODI25a    | -0.33 | -0.38 | -0.37 | -0.34 | -0.33 | -0.39 | -0.42 | -0.35 | -0.35 | -0.15 | 0.01  |
| ArkBB   | ODI33     | 0.23  | 0.23  | 0.21  | 0.19  | 0.22  | 0.24  | 0.26  | 0.19  | 0.06  | -0.02 | -0.02 |
| FehBB   | ODI33     | -0.48 | -0.47 | -0.47 | -0.46 | -0.45 | -0.45 | -0.47 | -0.43 | -0.37 | -0.30 | -0.16 |
| FinoPF1 | ODI33     | -0.06 | -0.12 | -0.12 | -0.16 | -0.11 | -0.13 | -0.11 | -0.09 | -0.23 | -0.13 | 0.01  |
| FinoPF3 | ODI33     | -0.26 | -0.24 | -0.21 | -0.19 | -0.24 | -0.27 | -0.23 | -0.17 | -0.04 | 0.13  | 0.25  |
| GB      | ODI33     | -0.56 | -0.55 | -0.55 | -0.55 | -0.58 | -0.56 | -0.47 | -0.29 | -0.05 | 0.15  | 0.24  |
| KielLH  | ODI33     | -0.48 | -0.52 | -0.56 | -0.59 | -0.66 | -0.69 | -0.68 | -0.61 | -0.46 | -0.29 | -0.13 |
| MePDS   | ODI33     | -0.38 | -0.34 | -0.31 | -0.31 | -0.31 | -0.38 | -0.40 | -0.37 | -0.32 | -0.22 | -0.05 |
| NSBII   | ODI33     | -0.65 | -0.69 | -0.73 | -0.75 | -0.77 | -0.74 | -0.61 | -0.46 | -0.29 | -0.06 | 0.17  |
| NSBIII  | ODI33     | -0.56 | -0.58 | -0.58 | -0.57 | -0.63 | -0.61 | -0.60 | -0.53 | -0.37 | -0.17 | -0.00 |
| TWEms   | ODI33     | -0.44 | -0.46 | -0.42 | -0.36 | -0.32 | -0.34 | -0.36 | -0.34 | -0.33 | -0.10 | 0.03  |
| ArkBB   | ODI33a    | 0.23  | 0.23  | 0.21  | 0.19  | 0.22  | 0.24  | 0.26  | 0.19  | 0.06  | -0.02 | -0.02 |
| FehBB   | ODI33a    | -0.48 | -0.47 | -0.47 | -0.46 | -0.45 | -0.45 | -0.47 | -0.43 | -0.37 | -0.30 | -0.16 |
| FinoPF1 | ODI33a    | -0.06 | -0.12 | -0.12 | -0.16 | -0.11 | -0.13 | -0.11 | -0.09 | -0.23 | -0.13 | 0.01  |
| FinoPF3 | ODI33a    | -0.26 | -0.24 | -0.21 | -0.19 | -0.24 | -0.27 | -0.23 | -0.17 | -0.04 | 0.13  | 0.25  |
| GB      | ODI33a    | -0.56 | -0.55 | -0.55 | -0.55 | -0.58 | -0.56 | -0.47 | -0.29 | -0.05 | 0.15  | 0.24  |
| MePDS   | ODI33a    | -0.38 | -0.34 | -0.31 | -0.31 | -0.31 | -0.38 | -0.40 | -0.37 | -0.32 | -0.22 | -0.05 |
| NSBII   | ODI33a    | -0.65 | -0.69 | -0.73 | -0.75 | -0.77 | -0.74 | -0.61 | -0.46 | -0.29 | -0.06 | 0.17  |
| NSBIII  | ODI33a    | -0.56 | -0.58 | -0.58 | -0.57 | -0.63 | -0.61 | -0.60 | -0.53 | -0.37 | -0.17 | -0.00 |
| TWEms   | ODI33a    | -0.44 | -0.46 | -0.42 | -0.36 | -0.32 | -0.34 | -0.36 | -0.34 | -0.33 | -0.10 | 0.03  |
| ArkBB   | ODI33rev  | 0.16  | 0.09  | 0.03  | -0.02 | -0.06 | -0.06 | -0.09 | -0.18 | -0.28 | -0.29 | -0.20 |
| FehBB   | ODI33rev  | -0.35 | -0.36 | -0.37 | -0.38 | -0.43 | -0.48 | -0.54 | -0.53 | -0.50 | -0.43 | -0.32 |
| FinoPF1 | ODI33rev  | -0.06 | -0.12 | -0.12 | -0.16 | -0.11 | -0.13 | -0.11 | -0.09 | -0.23 | -0.13 | 0.01  |
| FinoPF3 | ODI33rev  | -0.32 | -0.30 | -0.28 | -0.25 | -0.33 | -0.40 | -0.35 | -0.24 | -0.05 | 0.13  | 0.20  |
| GB      | ODI33rev  | -0.48 | -0.49 | -0.49 | -0.50 | -0.53 | -0.51 | -0.48 | -0.38 | -0.17 | 0.06  | 0.18  |
| KielLH  | ODI33rev  | -0.39 | -0.45 | -0.51 | -0.55 | -0.62 | -0.66 | -0.70 | -0.69 | -0.57 | -0.40 | -0.23 |
| MePDS   | ODI33rev  | -0.32 | -0.31 | -0.30 | -0.32 | -0.36 | -0.47 | -0.50 | -0.51 | -0.44 | -0.32 | -0.12 |
| NSBII   | ODI33rev  | -0.64 | -0.66 | -0.70 | -0.71 | -0.73 | -0.72 | -0.61 | -0.49 | -0.35 | -0.17 | 0.03  |
| NSBIII  | ODI33rev  | -0.47 | -0.50 | -0.52 | -0.52 | -0.58 | -0.57 | -0.58 | -0.53 | -0.38 | -0.23 | -0.08 |
| TWEms   | ODI33rev  | -0.35 | -0.39 | -0.38 | -0.35 | -0.33 | -0.39 | -0.41 | -0.39 | -0.35 | -0.14 | 0.01  |
| ArkBB   | ODI33reva | 0.16  | 0.09  | 0.03  | -0.02 | -0.06 | -0.06 | -0.09 | -0.18 | -0.28 | -0.29 | -0.20 |
| FehBB   | ODI33reva | -0.35 | -0.36 | -0.37 | -0.38 | -0.43 | -0.48 | -0.54 | -0.53 | -0.50 | -0.43 | -0.32 |
| FinoPF1 | ODI33reva | -0.06 | -0.12 | -0.12 | -0.16 | -0.11 | -0.13 | -0.11 | -0.09 | -0.23 | -0.13 | 0.01  |
| FinoPF3 | ODI33reva | -0.32 | -0.30 | -0.28 | -0.25 | -0.33 | -0.40 | -0.35 | -0.24 | -0.05 | 0.13  | 0.20  |
| GB      | ODI33reva | -0.48 | -0.49 | -0.49 | -0.50 | -0.53 | -0.51 | -0.48 | -0.38 | -0.17 | 0.06  | 0.18  |
| MePDS   | ODI33reva | -0.32 | -0.31 | -0.30 | -0.32 | -0.36 | -0.47 | -0.50 | -0.51 | -0.44 | -0.32 | -0.12 |
| NSBII   | ODI33reva | -0.64 | -0.66 | -0.70 | -0.71 | -0.73 | -0.72 | -0.61 | -0.49 | -0.35 | -0.17 | 0.03  |

|         |            |       |       |       |       |       |       |       |       |       |       |       |
|---------|------------|-------|-------|-------|-------|-------|-------|-------|-------|-------|-------|-------|
| NSBIII  | ODI33reva  | -0.47 | -0.50 | -0.52 | -0.52 | -0.58 | -0.57 | -0.58 | -0.53 | -0.38 | -0.23 | -0.08 |
| TWEms   | ODI33reva  | -0.35 | -0.39 | -0.38 | -0.35 | -0.33 | -0.39 | -0.41 | -0.39 | -0.35 | -0.14 | 0.01  |
| ArkBB   | ODIhalf    | 0.19  | 0.14  | 0.09  | 0.06  | 0.04  | 0.05  | 0.04  | -0.06 | -0.17 | -0.20 | -0.15 |
| FehBB   | ODIhalf    | -0.43 | -0.43 | -0.43 | -0.44 | -0.46 | -0.48 | -0.52 | -0.50 | -0.45 | -0.37 | -0.24 |
| FinoPF1 | ODIhalf    | -0.06 | -0.12 | -0.12 | -0.16 | -0.11 | -0.13 | -0.11 | -0.09 | -0.23 | -0.13 | 0.01  |
| FinoPF3 | ODIhalf    | -0.29 | -0.28 | -0.25 | -0.23 | -0.29 | -0.34 | -0.30 | -0.21 | -0.05 | 0.13  | 0.23  |
| GB      | ODIhalf    | -0.52 | -0.52 | -0.52 | -0.53 | -0.56 | -0.54 | -0.48 | -0.34 | -0.11 | 0.10  | 0.21  |
| KielLH  | ODIhalf    | -0.44 | -0.49 | -0.54 | -0.58 | -0.65 | -0.69 | -0.70 | -0.65 | -0.52 | -0.34 | -0.18 |
| MePDS   | ODIhalf    | -0.36 | -0.33 | -0.32 | -0.32 | -0.35 | -0.43 | -0.46 | -0.45 | -0.38 | -0.27 | -0.08 |
| NSBII   | ODIhalf    | -0.65 | -0.68 | -0.72 | -0.73 | -0.75 | -0.73 | -0.62 | -0.48 | -0.32 | -0.12 | 0.09  |
| NSBIII  | ODIhalf    | -0.52 | -0.54 | -0.55 | -0.55 | -0.61 | -0.59 | -0.59 | -0.53 | -0.38 | -0.21 | -0.05 |
| TWEms   | ODIhalf    | -0.39 | -0.42 | -0.40 | -0.36 | -0.33 | -0.37 | -0.39 | -0.35 | -0.34 | -0.13 | 0.02  |
| ArkBB   | ODIhalfa   | 0.19  | 0.14  | 0.09  | 0.06  | 0.04  | 0.05  | 0.04  | -0.06 | -0.17 | -0.20 | -0.15 |
| FehBB   | ODIhalfa   | -0.43 | -0.43 | -0.43 | -0.44 | -0.46 | -0.48 | -0.52 | -0.50 | -0.45 | -0.37 | -0.24 |
| FinoPF1 | ODIhalfa   | -0.06 | -0.12 | -0.12 | -0.16 | -0.11 | -0.13 | -0.11 | -0.09 | -0.23 | -0.13 | 0.01  |
| FinoPF3 | ODIhalfa   | -0.29 | -0.28 | -0.25 | -0.23 | -0.29 | -0.34 | -0.30 | -0.21 | -0.05 | 0.13  | 0.23  |
| GB      | ODIhalfa   | -0.52 | -0.52 | -0.52 | -0.53 | -0.56 | -0.54 | -0.48 | -0.34 | -0.11 | 0.10  | 0.21  |
| MePDS   | ODIhalfa   | -0.36 | -0.33 | -0.32 | -0.32 | -0.35 | -0.43 | -0.46 | -0.45 | -0.38 | -0.27 | -0.08 |
| NSBII   | ODIhalfa   | -0.65 | -0.68 | -0.72 | -0.73 | -0.75 | -0.73 | -0.62 | -0.48 | -0.32 | -0.12 | 0.09  |
| NSBIII  | ODIhalfa   | -0.52 | -0.54 | -0.55 | -0.55 | -0.61 | -0.59 | -0.59 | -0.53 | -0.38 | -0.21 | -0.05 |
| TWEms   | ODIhalfa   | -0.39 | -0.42 | -0.40 | -0.36 | -0.33 | -0.37 | -0.39 | -0.35 | -0.34 | -0.13 | 0.02  |
| ArkBB   | seasODI25  | -0.33 | -0.39 | -0.46 | -0.51 | -0.57 | -0.52 | -0.49 | -0.44 | -0.34 | -0.18 | 0.01  |
| FehBB   | seasODI25  | -0.78 | -0.77 | -0.76 | -0.74 | -0.68 | -0.55 | -0.38 | -0.21 | -0.05 | 0.10  | 0.24  |
| FinoPF1 | seasODI25  | -0.08 | -0.10 | -0.08 | -0.09 | -0.08 | -0.09 | -0.08 | -0.08 | -0.19 | -0.15 | -0.04 |
| FinoPF3 | seasODI25  | -0.55 | -0.54 | -0.50 | -0.46 | -0.44 | -0.40 | -0.27 | -0.12 | 0.05  | 0.15  | 0.20  |
| GB      | seasODI25  | -0.65 | -0.63 | -0.60 | -0.57 | -0.52 | -0.41 | -0.29 | -0.15 | 0.03  | 0.23  | 0.32  |
| KielLH  | seasODI25  | -0.66 | -0.70 | -0.73 | -0.75 | -0.77 | -0.73 | -0.65 | -0.53 | -0.35 | -0.15 | 0.03  |
| MePDS   | seasODI25  | -0.65 | -0.65 | -0.64 | -0.65 | -0.64 | -0.59 | -0.47 | -0.32 | -0.17 | -0.01 | 0.16  |
| NSBII   | seasODI25  | -0.71 | -0.73 | -0.75 | -0.75 | -0.71 | -0.63 | -0.48 | -0.30 | -0.13 | 0.05  | 0.24  |
| NSBIII  | seasODI25  | -0.56 | -0.56 | -0.56 | -0.56 | -0.62 | -0.57 | -0.52 | -0.43 | -0.25 | -0.08 | 0.03  |
| TWEms   | seasODI25  | -0.58 | -0.57 | -0.53 | -0.49 | -0.35 | -0.33 | -0.29 | -0.16 | -0.12 | -0.06 | -0.02 |
| ArkBB   | seasODI25a | -0.33 | -0.39 | -0.46 | -0.51 | -0.57 | -0.52 | -0.49 | -0.44 | -0.34 | -0.18 | 0.01  |
| FehBB   | seasODI25a | -0.78 | -0.77 | -0.76 | -0.74 | -0.68 | -0.55 | -0.38 | -0.21 | -0.05 | 0.10  | 0.24  |
| FinoPF1 | seasODI25a | -0.08 | -0.10 | -0.08 | -0.09 | -0.08 | -0.09 | -0.08 | -0.08 | -0.19 | -0.15 | -0.04 |
| FinoPF3 | seasODI25a | -0.55 | -0.54 | -0.50 | -0.46 | -0.44 | -0.40 | -0.27 | -0.12 | 0.05  | 0.15  | 0.20  |
| GB      | seasODI25a | -0.65 | -0.63 | -0.60 | -0.57 | -0.52 | -0.41 | -0.29 | -0.15 | 0.03  | 0.23  | 0.32  |
| MePDS   | seasODI25a | -0.65 | -0.65 | -0.64 | -0.65 | -0.64 | -0.59 | -0.47 | -0.32 | -0.17 | -0.01 | 0.16  |
| NSBII   | seasODI25a | -0.71 | -0.73 | -0.75 | -0.75 | -0.71 | -0.63 | -0.48 | -0.30 | -0.13 | 0.05  | 0.24  |
| NSBIII  | seasODI25a | -0.56 | -0.56 | -0.56 | -0.56 | -0.62 | -0.57 | -0.52 | -0.43 | -0.25 | -0.08 | 0.03  |
| TWEms   | seasODI25a | -0.58 | -0.57 | -0.53 | -0.49 | -0.35 | -0.33 | -0.29 | -0.16 | -0.12 | -0.06 | -0.02 |
| ArkBB   | seasODI33  | -0.28 | -0.28 | -0.30 | -0.32 | -0.33 | -0.27 | -0.20 | -0.14 | -0.07 | 0.05  | 0.18  |
| FehBB   | seasODI33  | -0.67 | -0.66 | -0.64 | -0.62 | -0.56 | -0.48 | -0.39 | -0.27 | -0.16 | -0.05 | 0.10  |
| FinoPF1 | seasODI33  | -0.08 | -0.10 | -0.08 | -0.09 | -0.08 | -0.09 | -0.08 | -0.08 | -0.19 | -0.15 | -0.04 |
| FinoPF3 | seasODI33  | -0.38 | -0.36 | -0.33 | -0.29 | -0.28 | -0.25 | -0.17 | -0.10 | 0.01  | 0.15  | 0.25  |
| GB      | seasODI33  | -0.64 | -0.62 | -0.60 | -0.58 | -0.58 | -0.51 | -0.37 | -0.16 | 0.07  | 0.23  | 0.31  |
| KielLH  | seasODI33  | -0.58 | -0.61 | -0.64 | -0.66 | -0.71 | -0.71 | -0.65 | -0.54 | -0.37 | -0.19 | -0.02 |
| MePDS   | seasODI33  | -0.52 | -0.49 | -0.46 | -0.44 | -0.43 | -0.43 | -0.39 | -0.30 | -0.21 | -0.10 | 0.07  |
| NSBII   | seasODI33  | -0.70 | -0.74 | -0.77 | -0.78 | -0.76 | -0.69 | -0.54 | -0.35 | -0.16 | 0.07  | 0.31  |
| NSBIII  | seasODI33  | -0.60 | -0.60 | -0.59 | -0.59 | -0.65 | -0.62 | -0.57 | -0.47 | -0.29 | -0.08 | 0.07  |

|         |               |       |       |       |       |       |       |       |       |       |       |       |
|---------|---------------|-------|-------|-------|-------|-------|-------|-------|-------|-------|-------|-------|
| TWEms   | seasODI33     | -0.59 | -0.57 | -0.52 | -0.45 | -0.33 | -0.28 | -0.26 | -0.19 | -0.14 | -0.01 | 0.02  |
| ArkBB   | seasODI33a    | -0.28 | -0.28 | -0.30 | -0.32 | -0.33 | -0.27 | -0.20 | -0.14 | -0.07 | 0.05  | 0.18  |
| FehBB   | seasODI33a    | -0.67 | -0.66 | -0.64 | -0.62 | -0.56 | -0.48 | -0.39 | -0.27 | -0.16 | -0.05 | 0.10  |
| FinoPF1 | seasODI33a    | -0.08 | -0.10 | -0.08 | -0.09 | -0.08 | -0.09 | -0.08 | -0.08 | -0.19 | -0.15 | -0.04 |
| FinoPF3 | seasODI33a    | -0.38 | -0.36 | -0.33 | -0.29 | -0.28 | -0.25 | -0.17 | -0.10 | 0.01  | 0.15  | 0.25  |
| GB      | seasODI33a    | -0.64 | -0.62 | -0.60 | -0.58 | -0.58 | -0.51 | -0.37 | -0.16 | 0.07  | 0.23  | 0.31  |
| MePDS   | seasODI33a    | -0.52 | -0.49 | -0.46 | -0.44 | -0.43 | -0.43 | -0.39 | -0.30 | -0.21 | -0.10 | 0.07  |
| NSBII   | seasODI33a    | -0.70 | -0.74 | -0.77 | -0.78 | -0.76 | -0.69 | -0.54 | -0.35 | -0.16 | 0.07  | 0.31  |
| NSBIII  | seasODI33a    | -0.60 | -0.60 | -0.59 | -0.59 | -0.65 | -0.62 | -0.57 | -0.47 | -0.29 | -0.08 | 0.07  |
| TWEms   | seasODI33a    | -0.59 | -0.57 | -0.52 | -0.45 | -0.33 | -0.28 | -0.26 | -0.19 | -0.14 | -0.01 | 0.02  |
| ArkBB   | seasODI33rev  | -0.33 | -0.39 | -0.45 | -0.50 | -0.56 | -0.51 | -0.46 | -0.42 | -0.32 | -0.16 | 0.02  |
| FehBB   | seasODI33rev  | -0.77 | -0.76 | -0.75 | -0.73 | -0.66 | -0.54 | -0.39 | -0.22 | -0.07 | 0.07  | 0.21  |
| FinoPF1 | seasODI33rev  | -0.08 | -0.10 | -0.08 | -0.09 | -0.08 | -0.09 | -0.08 | -0.08 | -0.19 | -0.15 | -0.04 |
| FinoPF3 | seasODI33rev  | -0.52 | -0.51 | -0.48 | -0.44 | -0.42 | -0.38 | -0.25 | -0.11 | 0.04  | 0.15  | 0.21  |
| GB      | seasODI33rev  | -0.65 | -0.63 | -0.60 | -0.58 | -0.54 | -0.43 | -0.31 | -0.16 | 0.04  | 0.23  | 0.32  |
| KielLH  | seasODI33rev  | -0.65 | -0.69 | -0.72 | -0.74 | -0.76 | -0.73 | -0.66 | -0.54 | -0.36 | -0.16 | 0.02  |
| MePDS   | seasODI33rev  | -0.64 | -0.63 | -0.62 | -0.62 | -0.61 | -0.57 | -0.47 | -0.32 | -0.19 | -0.03 | 0.14  |
| NSBII   | seasODI33rev  | -0.72 | -0.74 | -0.76 | -0.75 | -0.72 | -0.64 | -0.49 | -0.31 | -0.14 | 0.05  | 0.25  |
| NSBIII  | seasODI33rev  | -0.56 | -0.57 | -0.57 | -0.57 | -0.63 | -0.58 | -0.53 | -0.44 | -0.26 | -0.08 | 0.04  |
| TWEms   | seasODI33rev  | -0.58 | -0.57 | -0.53 | -0.48 | -0.35 | -0.32 | -0.29 | -0.16 | -0.13 | -0.06 | -0.01 |
| ArkBB   | seasODI33reva | -0.33 | -0.39 | -0.45 | -0.50 | -0.56 | -0.51 | -0.46 | -0.42 | -0.32 | -0.16 | 0.02  |
| FehBB   | seasODI33reva | -0.77 | -0.76 | -0.75 | -0.73 | -0.66 | -0.54 | -0.39 | -0.22 | -0.07 | 0.07  | 0.21  |
| FinoPF1 | seasODI33reva | -0.08 | -0.10 | -0.08 | -0.09 | -0.08 | -0.09 | -0.08 | -0.08 | -0.19 | -0.15 | -0.04 |
| FinoPF3 | seasODI33reva | -0.52 | -0.51 | -0.48 | -0.44 | -0.42 | -0.38 | -0.25 | -0.11 | 0.04  | 0.15  | 0.21  |
| GB      | seasODI33reva | -0.65 | -0.63 | -0.60 | -0.58 | -0.54 | -0.43 | -0.31 | -0.16 | 0.04  | 0.23  | 0.32  |
| MePDS   | seasODI33reva | -0.64 | -0.63 | -0.62 | -0.62 | -0.61 | -0.57 | -0.47 | -0.32 | -0.19 | -0.03 | 0.14  |
| NSBII   | seasODI33reva | -0.72 | -0.74 | -0.76 | -0.75 | -0.72 | -0.64 | -0.49 | -0.31 | -0.14 | 0.05  | 0.25  |
| NSBIII  | seasODI33reva | -0.56 | -0.57 | -0.57 | -0.57 | -0.63 | -0.58 | -0.53 | -0.44 | -0.26 | -0.08 | 0.04  |
| TWEms   | seasODI33reva | -0.58 | -0.57 | -0.53 | -0.48 | -0.35 | -0.32 | -0.29 | -0.16 | -0.13 | -0.06 | -0.01 |
| ArkBB   | seasODIhalf   | -0.33 | -0.37 | -0.42 | -0.46 | -0.50 | -0.44 | -0.39 | -0.34 | -0.25 | -0.09 | 0.07  |
| FehBB   | seasODIhalf   | -0.73 | -0.72 | -0.71 | -0.69 | -0.62 | -0.52 | -0.39 | -0.25 | -0.11 | 0.01  | 0.16  |
| FinoPF1 | seasODIhalf   | -0.08 | -0.10 | -0.08 | -0.09 | -0.08 | -0.09 | -0.08 | -0.08 | -0.19 | -0.15 | -0.04 |
| FinoPF3 | seasODIhalf   | -0.45 | -0.44 | -0.41 | -0.37 | -0.35 | -0.32 | -0.21 | -0.11 | 0.02  | 0.15  | 0.23  |
| GB      | seasODIhalf   | -0.65 | -0.63 | -0.61 | -0.58 | -0.56 | -0.48 | -0.34 | -0.16 | 0.05  | 0.23  | 0.32  |
| KielLH  | seasODIhalf   | -0.61 | -0.65 | -0.68 | -0.70 | -0.74 | -0.73 | -0.66 | -0.54 | -0.37 | -0.17 | -0.00 |
| MePDS   | seasODIhalf   | -0.59 | -0.57 | -0.54 | -0.54 | -0.52 | -0.51 | -0.44 | -0.32 | -0.20 | -0.06 | 0.10  |
| NSBII   | seasODIhalf   | -0.71 | -0.74 | -0.77 | -0.77 | -0.74 | -0.67 | -0.51 | -0.33 | -0.15 | 0.06  | 0.28  |
| NSBIII  | seasODIhalf   | -0.58 | -0.59 | -0.58 | -0.58 | -0.64 | -0.60 | -0.56 | -0.46 | -0.28 | -0.08 | 0.05  |
| TWEms   | seasODIhalf   | -0.59 | -0.58 | -0.53 | -0.47 | -0.34 | -0.31 | -0.28 | -0.17 | -0.13 | -0.04 | -0.00 |
| ArkBB   | seasODIhalfa  | -0.33 | -0.37 | -0.42 | -0.46 | -0.50 | -0.44 | -0.39 | -0.34 | -0.25 | -0.09 | 0.07  |
| FehBB   | seasODIhalfa  | -0.73 | -0.72 | -0.71 | -0.69 | -0.62 | -0.52 | -0.39 | -0.25 | -0.11 | 0.01  | 0.16  |
| FinoPF1 | seasODIhalfa  | -0.08 | -0.10 | -0.08 | -0.09 | -0.08 | -0.09 | -0.08 | -0.08 | -0.19 | -0.15 | -0.04 |
| FinoPF3 | seasODIhalfa  | -0.45 | -0.44 | -0.41 | -0.37 | -0.35 | -0.32 | -0.21 | -0.11 | 0.02  | 0.15  | 0.23  |
| GB      | seasODIhalfa  | -0.65 | -0.63 | -0.61 | -0.58 | -0.56 | -0.48 | -0.34 | -0.16 | 0.05  | 0.23  | 0.32  |
| MePDS   | seasODIhalfa  | -0.59 | -0.57 | -0.54 | -0.54 | -0.52 | -0.51 | -0.44 | -0.32 | -0.20 | -0.06 | 0.10  |
| NSBII   | seasODIhalfa  | -0.71 | -0.74 | -0.77 | -0.77 | -0.74 | -0.67 | -0.51 | -0.33 | -0.15 | 0.06  | 0.28  |
| NSBIII  | seasODIhalfa  | -0.58 | -0.59 | -0.58 | -0.58 | -0.64 | -0.60 | -0.56 | -0.46 | -0.28 | -0.08 | 0.05  |
| TWEms   | seasODIhalfa  | -0.59 | -0.58 | -0.53 | -0.47 | -0.34 | -0.31 | -0.28 | -0.17 | -0.13 | -0.04 | -0.00 |

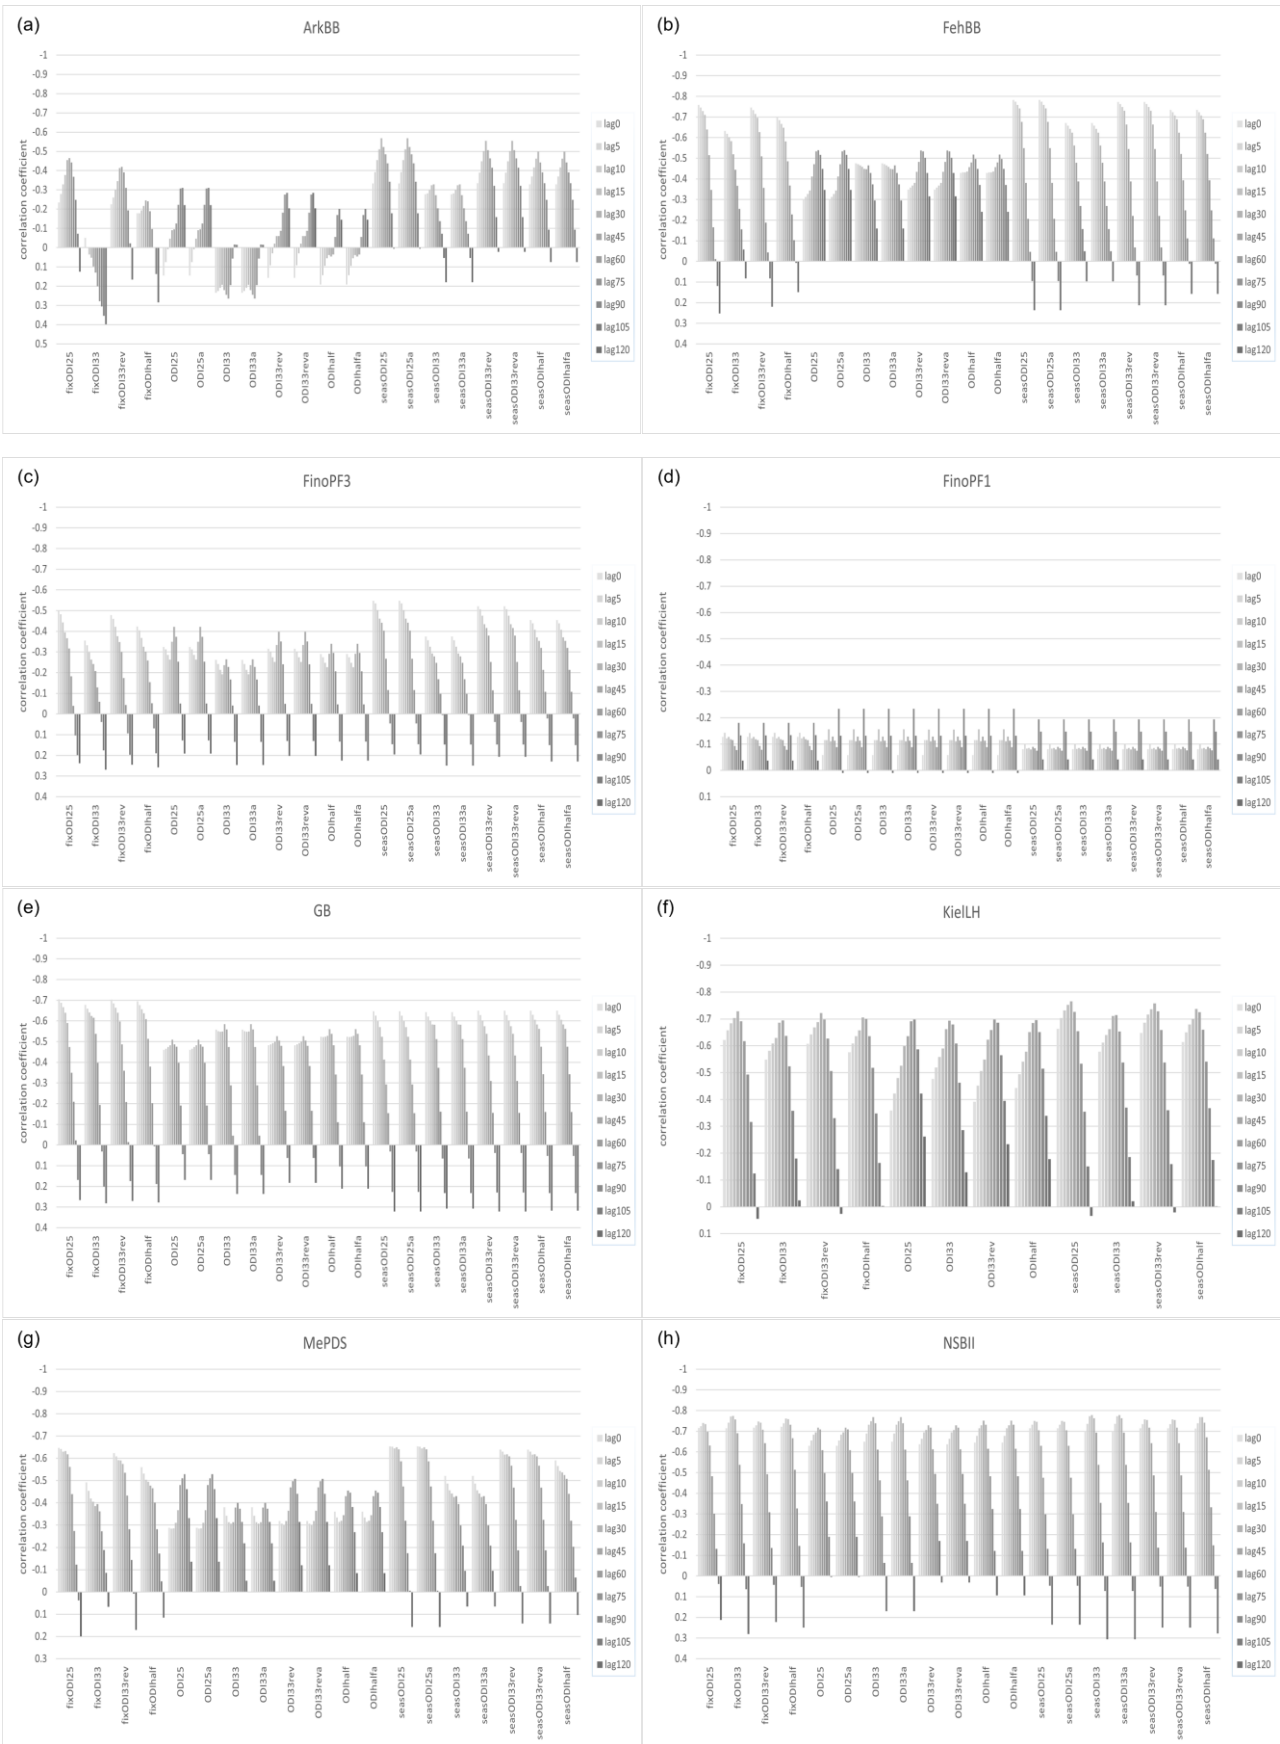

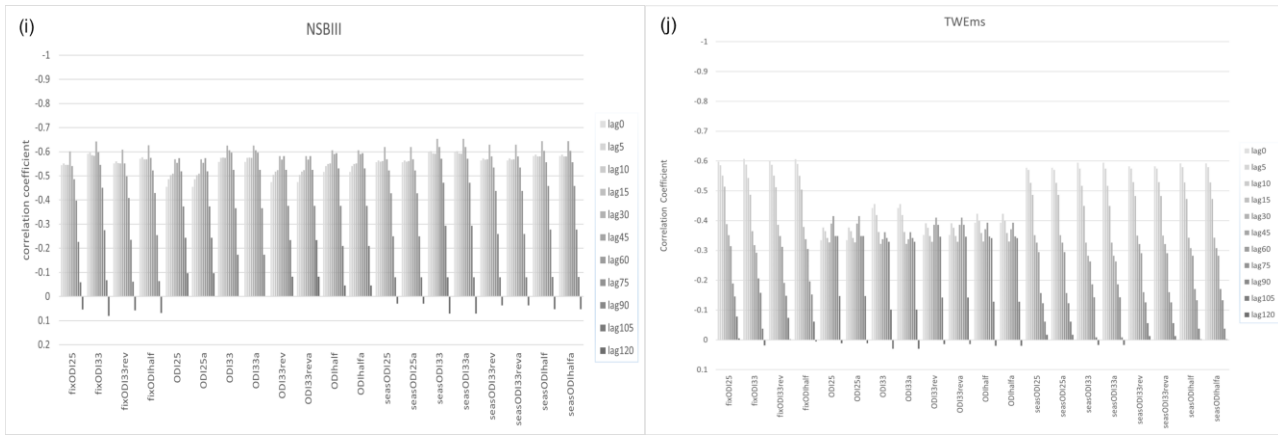

**Supplement Figure 1 (a-i): Correlation Coefficients according to Supplement Table 3, for each station (Marnet, 2018-2023) and each ODI configuration over all lags; negative and positive values of the correlation coefficient on the y axis are shown in reverse order. Diagrams illustrate the potential of the ODI for forecasting seasonal ODZs according to their correlation values (further discussed in the main manuscript).**

**Supplement Table 4: Sensor 1 – Per Year clustered Correlation coefficients ODI vs Observations, at KielLH station, and all lags.**

| station_2018 | ODI          | lag0  | lag5  | lag10 | lag15 | lag30 | lag45 | lag60 | lag75 | lag90 | lag105 | lag120 |
|--------------|--------------|-------|-------|-------|-------|-------|-------|-------|-------|-------|--------|--------|
| KielLH       | fixODI25     | -0.73 | -0.77 | -0.78 | -0.78 | -0.79 | -0.68 | -0.58 | -0.41 | -0.17 | 0.03   | 0.17   |
| KielLH       | fixODI33     | -0.71 | -0.73 | -0.74 | -0.74 | -0.77 | -0.71 | -0.62 | -0.42 | -0.15 | 0.05   | 0.18   |
| KielLH       | fixODI33rev  | -0.73 | -0.76 | -0.77 | -0.77 | -0.78 | -0.69 | -0.59 | -0.42 | -0.16 | 0.03   | 0.17   |
| KielLH       | fixODIhalf   | -0.72 | -0.75 | -0.75 | -0.76 | -0.78 | -0.70 | -0.61 | -0.42 | -0.16 | 0.05   | 0.18   |
| KielLH       | ODI25        | -0.46 | -0.53 | -0.57 | -0.60 | -0.66 | -0.66 | -0.71 | -0.67 | -0.48 | -0.27  | -0.13  |
| KielLH       | ODI33        | -0.64 | -0.68 | -0.70 | -0.70 | -0.75 | -0.73 | -0.68 | -0.52 | -0.25 | -0.04  | 0.08   |
| KielLH       | ODI33rev     | -0.51 | -0.57 | -0.61 | -0.63 | -0.69 | -0.69 | -0.71 | -0.64 | -0.43 | -0.21  | -0.08  |
| KielLH       | ODIhalf      | -0.59 | -0.63 | -0.66 | -0.68 | -0.73 | -0.72 | -0.71 | -0.58 | -0.33 | -0.12  | 0.01   |
| KielLH       | seasODI25    | -0.73 | -0.76 | -0.77 | -0.78 | -0.79 | -0.69 | -0.60 | -0.44 | -0.20 | -0.01  | 0.14   |
| KielLH       | seasODI33    | -0.71 | -0.74 | -0.74 | -0.75 | -0.77 | -0.71 | -0.62 | -0.43 | -0.16 | 0.04   | 0.17   |
| KielLH       | seasODI33rev | -0.73 | -0.76 | -0.77 | -0.77 | -0.79 | -0.70 | -0.60 | -0.44 | -0.19 | 0.00   | 0.14   |
| KielLH       | seasODIhalf  | -0.72 | -0.75 | -0.76 | -0.76 | -0.78 | -0.71 | -0.62 | -0.44 | -0.18 | 0.02   | 0.16   |

  

| station_2019 | ODI          | lag0  | lag5  | lag10 | lag15 | lag30 | lag45 | lag60 | lag75 | lag90 | lag105 | lag120 |
|--------------|--------------|-------|-------|-------|-------|-------|-------|-------|-------|-------|--------|--------|
| KielLH       | fixODI25     | -0.67 | -0.69 | -0.69 | -0.69 | -0.66 | -0.67 | -0.70 | -0.58 | -0.34 | -0.11  | 0.05   |
| KielLH       | fixODI33     | -0.62 | -0.61 | -0.60 | -0.58 | -0.54 | -0.59 | -0.65 | -0.57 | -0.36 | -0.16  | -0.02  |
| KielLH       | fixODI33rev  | -0.66 | -0.67 | -0.67 | -0.66 | -0.63 | -0.66 | -0.69 | -0.58 | -0.35 | -0.12  | 0.03   |
| KielLH       | fixODIhalf   | -0.64 | -0.64 | -0.64 | -0.62 | -0.58 | -0.62 | -0.67 | -0.57 | -0.36 | -0.15  | 0.00   |
| KielLH       | ODI25        | -0.49 | -0.53 | -0.57 | -0.58 | -0.60 | -0.63 | -0.74 | -0.70 | -0.53 | -0.38  | -0.28  |
| KielLH       | ODI33        | -0.57 | -0.58 | -0.58 | -0.57 | -0.54 | -0.60 | -0.69 | -0.63 | -0.45 | -0.27  | -0.14  |
| KielLH       | ODI33rev     | -0.51 | -0.55 | -0.58 | -0.58 | -0.59 | -0.63 | -0.73 | -0.69 | -0.52 | -0.36  | -0.26  |
| KielLH       | ODIhalf      | -0.55 | -0.57 | -0.58 | -0.58 | -0.57 | -0.62 | -0.72 | -0.67 | -0.48 | -0.31  | -0.20  |
| KielLH       | seasODI25    | -0.69 | -0.71 | -0.72 | -0.73 | -0.71 | -0.70 | -0.71 | -0.57 | -0.33 | -0.09  | 0.07   |
| KielLH       | seasODI33    | -0.64 | -0.64 | -0.63 | -0.62 | -0.57 | -0.62 | -0.67 | -0.57 | -0.36 | -0.15  | 0.00   |
| KielLH       | seasODI33rev | -0.68 | -0.70 | -0.71 | -0.71 | -0.68 | -0.69 | -0.70 | -0.58 | -0.34 | -0.11  | 0.05   |
| KielLH       | seasODIhalf  | -0.66 | -0.67 | -0.67 | -0.66 | -0.63 | -0.65 | -0.69 | -0.58 | -0.35 | -0.13  | 0.03   |

50

55

60



| <b>station_2020</b> | <b>ODI</b>   | <b>lag0</b> | <b>lag5</b> | <b>lag10</b> | <b>lag15</b> | <b>lag30</b> | <b>lag45</b> | <b>lag60</b> | <b>lag75</b> | <b>lag90</b> | <b>lag105</b> | <b>lag120</b> |
|---------------------|--------------|-------------|-------------|--------------|--------------|--------------|--------------|--------------|--------------|--------------|---------------|---------------|
| KielLH              | fixODI25     | -0.55       | -0.53       | -0.59        | -0.66        | -0.75        | -0.73        | -0.65        | -0.57        | -0.38        | -0.12         | 0.06          |
| KielLH              | fixODI33     | -0.43       | -0.36       | -0.43        | -0.50        | -0.67        | -0.72        | -0.70        | -0.65        | -0.50        | -0.27         | -0.08         |
| KielLH              | fixODI33rev  | -0.36       | -0.48       | -0.55        | -0.61        | -0.73        | -0.74        | -0.67        | -0.60        | -0.42        | -0.17         | 0.01          |
| KielLH              | fixODIhalf   | -0.51       | -0.40       | -0.47        | -0.55        | -0.70        | -0.73        | -0.69        | -0.63        | -0.47        | -0.24         | -0.04         |
| KielLH              | ODI25        | -0.45       | -0.33       | -0.42        | -0.50        | -0.56        | -0.55        | -0.64        | -0.75        | -0.62        | -0.39         | -0.22         |
| KielLH              | ODI33        | -0.33       | -0.32       | -0.40        | -0.48        | -0.62        | -0.67        | -0.70        | -0.71        | -0.57        | -0.35         | -0.16         |
| KielLH              | ODI33rev     | -0.29       | -0.33       | -0.42        | -0.50        | -0.58        | -0.59        | -0.66        | -0.75        | -0.61        | -0.38         | -0.21         |
| KielLH              | ODIhalf      | -0.40       | -0.32       | -0.41        | -0.49        | -0.61        | -0.63        | -0.68        | -0.73        | -0.59        | -0.37         | -0.18         |
| KielLH              | seasODI25    | -0.24       | -0.63       | -0.69        | -0.73        | -0.76        | -0.71        | -0.59        | -0.50        | -0.31        | -0.06         | 0.11          |
| KielLH              | seasODI33    | -0.24       | -0.43       | -0.50        | -0.57        | -0.70        | -0.73        | -0.69        | -0.63        | -0.47        | -0.23         | -0.04         |
| KielLH              | seasODI33rev | -0.24       | -0.59       | -0.65        | -0.70        | -0.75        | -0.72        | -0.62        | -0.54        | -0.35        | -0.10         | 0.07          |
| KielLH              | seasODIhalf  | -0.24       | -0.51       | -0.57        | -0.63        | -0.73        | -0.74        | -0.67        | -0.59        | -0.42        | -0.17         | 0.01          |

| <b>station_2021</b> | <b>ODI</b>   | <b>lag0</b> | <b>lag5</b> | <b>lag10</b> | <b>lag15</b> | <b>lag30</b> | <b>lag45</b> | <b>lag60</b> | <b>lag75</b> | <b>lag90</b> | <b>lag105</b> | <b>lag120</b> |
|---------------------|--------------|-------------|-------------|--------------|--------------|--------------|--------------|--------------|--------------|--------------|---------------|---------------|
| KielLH              | fixODI25     | -0.74       | -0.79       | -0.82        | -0.83        | -0.83        | -0.74        | -0.56        | -0.33        | -0.15        | 0.04          | 0.20          |
| KielLH              | fixODI33     | -0.74       | -0.79       | -0.82        | -0.82        | -0.82        | -0.73        | -0.53        | -0.29        | -0.11        | 0.06          | 0.19          |
| KielLH              | fixODI33rev  | -0.74       | -0.79       | -0.82        | -0.83        | -0.83        | -0.74        | -0.55        | -0.32        | -0.14        | 0.04          | 0.20          |
| KielLH              | fixODIhalf   | -0.74       | -0.79       | -0.82        | -0.83        | -0.82        | -0.74        | -0.54        | -0.30        | -0.12        | 0.05          | 0.19          |
| KielLH              | ODI25        | -0.47       | -0.54       | -0.61        | -0.65        | -0.73        | -0.78        | -0.75        | -0.65        | -0.47        | -0.20         | 0.02          |
| KielLH              | ODI33        | -0.69       | -0.75       | -0.79        | -0.81        | -0.83        | -0.79        | -0.62        | -0.42        | -0.23        | -0.02         | 0.13          |
| KielLH              | ODI33rev     | -0.53       | -0.60       | -0.67        | -0.70        | -0.77        | -0.80        | -0.73        | -0.61        | -0.42        | -0.16         | 0.05          |
| KielLH              | ODIhalf      | -0.63       | -0.69       | -0.75        | -0.77        | -0.82        | -0.80        | -0.68        | -0.51        | -0.32        | -0.09         | 0.10          |
| KielLH              | seasODI25    | -0.74       | -0.79       | -0.83        | -0.84        | -0.84        | -0.77        | -0.61        | -0.40        | -0.21        | -0.01         | 0.17          |
| KielLH              | seasODI33    | -0.74       | -0.79       | -0.82        | -0.83        | -0.83        | -0.75        | -0.55        | -0.32        | -0.14        | 0.04          | 0.18          |
| KielLH              | seasODI33rev | -0.74       | -0.79       | -0.83        | -0.84        | -0.84        | -0.77        | -0.60        | -0.38        | -0.19        | 0.00          | 0.17          |
| KielLH              | seasODIhalf  | -0.75       | -0.79       | -0.83        | -0.83        | -0.83        | -0.76        | -0.58        | -0.35        | -0.16        | 0.02          | 0.18          |

| <b>station_2022</b> | <b>ODI</b>   | <b>lag0</b> | <b>lag5</b> | <b>lag10</b> | <b>lag15</b> | <b>lag30</b> | <b>lag45</b> | <b>lag60</b> | <b>lag75</b> | <b>lag90</b> | <b>lag105</b> | <b>lag120</b> |
|---------------------|--------------|-------------|-------------|--------------|--------------|--------------|--------------|--------------|--------------|--------------|---------------|---------------|
| KielLH              | fixODI25     | -0.68       | -0.61       | -0.60        | -0.64        | -0.71        | -0.79        | -0.67        | -0.50        | -0.35        | -0.25         | -0.23         |
| KielLH              | fixODI33     | -0.48       | -0.24       | -0.24        | -0.32        | -0.55        | -0.72        | -0.59        | -0.45        | -0.33        | -0.25         | -0.24         |
| KielLH              | fixODI33rev  | -0.34       | -0.52       | -0.51        | -0.57        | -0.69        | -0.80        | -0.67        | -0.50        | -0.34        | -0.25         | -0.23         |
| KielLH              | fixODIhalf   | -0.62       | -0.36       | -0.36        | -0.43        | -0.62        | -0.77        | -0.63        | -0.47        | -0.33        | -0.25         | -0.24         |
| KielLH              | ODI25        | -0.63       | 0.02        | 0.03         | -0.07        | -0.28        | -0.53        | -0.62        | -0.66        | -0.63        | -0.40         | -0.14         |
| KielLH              | ODI33        | -0.39       | -0.07       | -0.07        | -0.17        | -0.43        | -0.66        | -0.60        | -0.52        | -0.44        | -0.32         | -0.23         |
| KielLH              | ODI33rev     | -0.27       | 0.00        | 0.01         | -0.09        | -0.32        | -0.58        | -0.64        | -0.64        | -0.60        | -0.39         | -0.16         |
| KielLH              | ODIhalf      | -0.55       | -0.04       | -0.04        | -0.14        | -0.39        | -0.64        | -0.63        | -0.58        | -0.52        | -0.35         | -0.20         |
| KielLH              | seasODI25    | 0.00        | -0.67       | -0.65        | -0.69        | -0.70        | -0.76        | -0.70        | -0.56        | -0.43        | -0.30         | -0.22         |
| KielLH              | seasODI33    | -0.06       | -0.32       | -0.32        | -0.40        | -0.60        | -0.76        | -0.63        | -0.49        | -0.36        | -0.27         | -0.24         |
| KielLH              | seasODI33rev | -0.09       | -0.61       | -0.60        | -0.66        | -0.71        | -0.80        | -0.71        | -0.56        | -0.42        | -0.29         | -0.23         |
| KielLH              | seasODIhalf  | -0.02       | -0.46       | -0.46        | -0.53        | -0.68        | -0.80        | -0.68        | -0.53        | -0.38        | -0.28         | -0.24         |

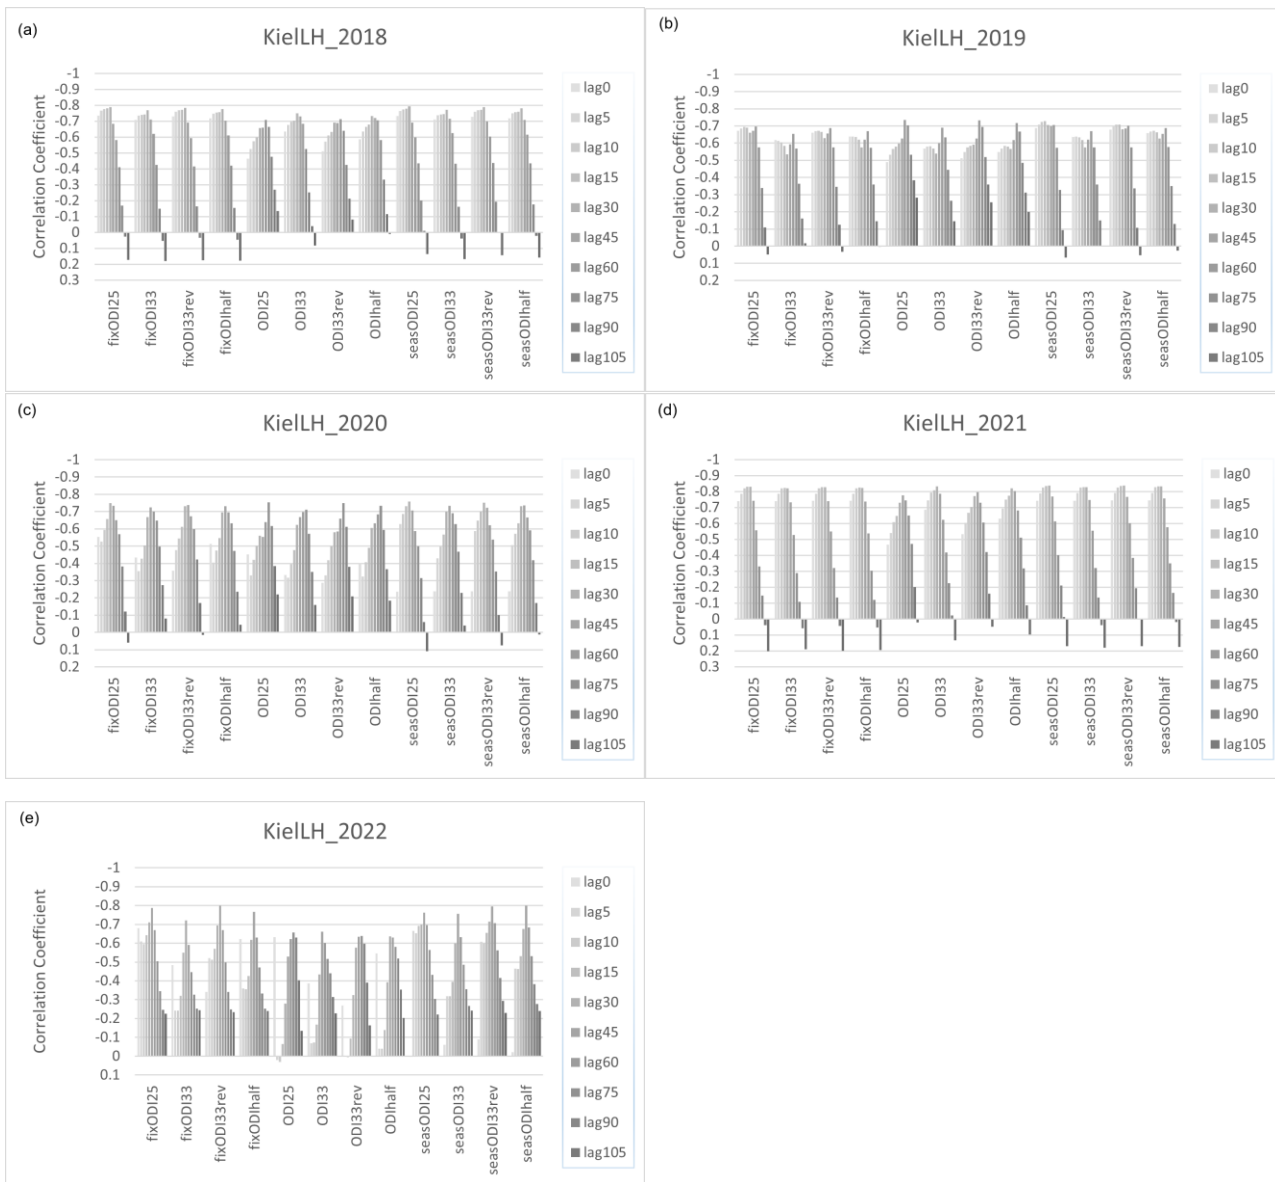

**Supplement Figure 2: Supplement Figure 3 (a-e): One Year clustered Correlation Coefficients according to Supplement Table 4, at station KielLH and each ODI configuration over all lags; negative and positive values of the correlation coefficient on the y axis are shown in reverse order.**

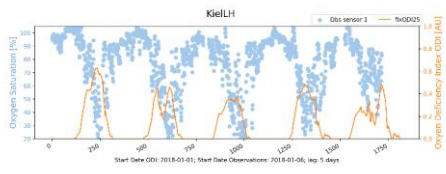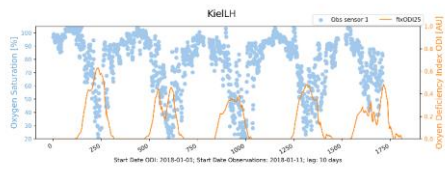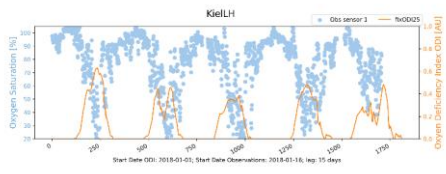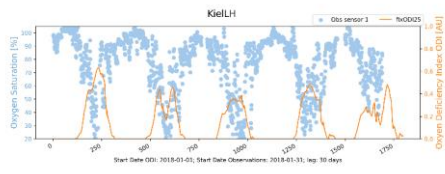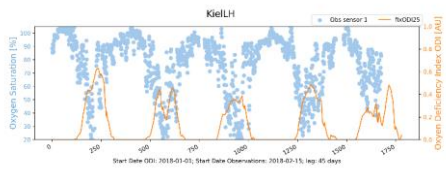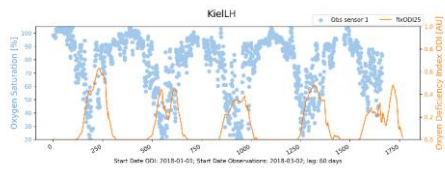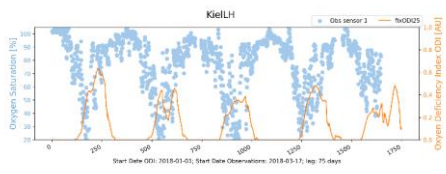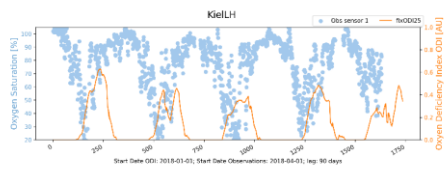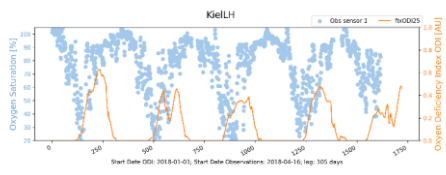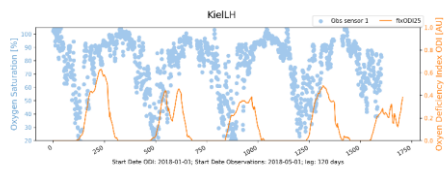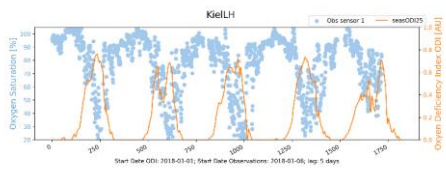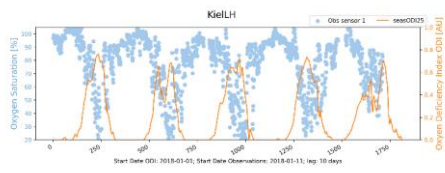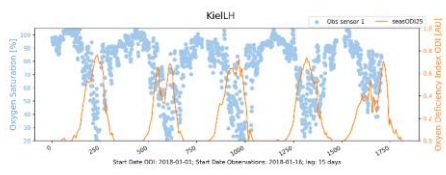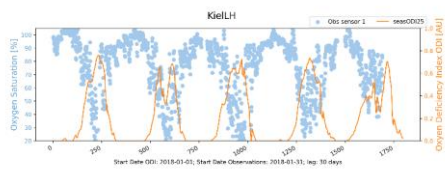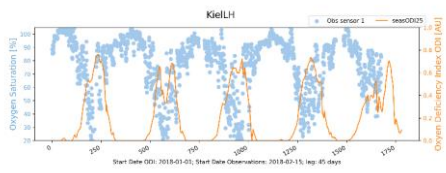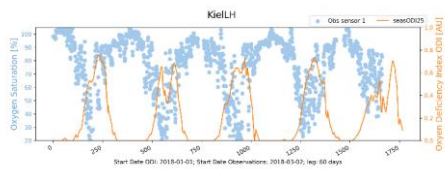

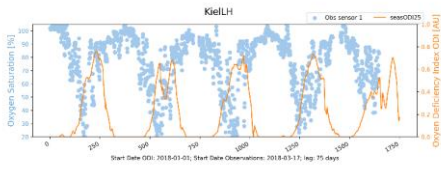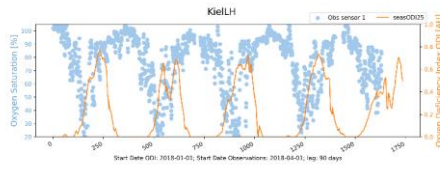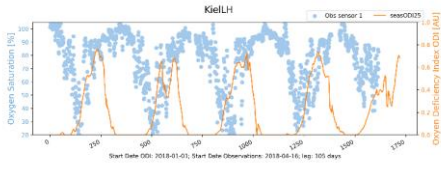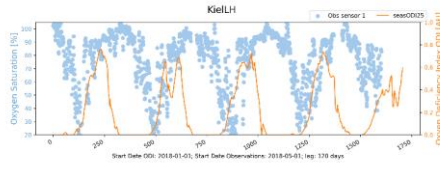

95

**Supplement Figure 3: The 20 panels above show the whole 5-year time-series of a fixODI25 and seasODI25 configuration compared to the data: Figures are sorted by station, and grouped by ODI configuration; each ODI cluster is showing the shifted lags, from lag5 to lag120; (Marnet, 2018-2023):**

100

Supplement Table 5: Sensor 2 – Correlation coefficients ODI vs Observations, at each station (Marnet, 2018-2023), and all lags.

| Station (sensor 2) | ODI      | lag0  | lag5  | lag10 | lag15 | lag30        | lag45        | lag60        | lag75        | lag90        | lag105 | lag120 |
|--------------------|----------|-------|-------|-------|-------|--------------|--------------|--------------|--------------|--------------|--------|--------|
| MePDS              | ODI33rev | -0.29 | -0.28 | -0.27 | -0.29 | -0.34        | -0.45        | -0.48        | <b>-0.49</b> | -0.43        | -0.31  | -0.12  |
| ArkBB              | ODI33rev | 0.27  | 0.20  | 0.13  | 0.07  | -0.02        | -0.08        | -0.19        | -0.30        | <b>-0.36</b> | -0.27  | -0.09  |
| FehBB              | ODI33rev | -0.49 | -0.47 | -0.44 | -0.41 | -0.50        | -0.61        | <b>-0.66</b> | -0.53        | -0.43        | -0.25  | 0.04   |
| NSBII              | ODI33rev | -0.58 | -0.60 | -0.62 | -0.64 | -0.67        | <b>-0.68</b> | -0.61        | -0.53        | -0.36        | -0.18  | -0.04  |
| NSBIII             | ODI33rev | -0.63 | -0.63 | -0.62 | -0.60 | <b>-0.69</b> | -0.68        | -0.65        | -0.50        | -0.27        | -0.09  | 0.10   |
| GB                 | ODI33rev | -0.15 | -0.19 | -0.24 | -0.29 | -0.45        | -0.54        | <b>-0.60</b> | -0.50        | -0.24        | -0.02  | 0.02   |

105

Supplement Table 3: Sensor 2 - Correlation coefficients ODI vs Observations, at each station (Marnet, 2018-2023), and all lags

| Station (sensor 2) | ODI         | lag0  | lag5  | lag10 | lag15 | lag30 | lag45 | lag60 | lag75 | lag90 | lag105 | lag120 |
|--------------------|-------------|-------|-------|-------|-------|-------|-------|-------|-------|-------|--------|--------|
| ArkBB              | fixODI25    | -0.18 | -0.25 | -0.32 | -0.38 | -0.46 | -0.42 | -0.37 | -0.31 | -0.20 | -0.02  | 0.14   |
| FehBB              | fixODI25    | -0.67 | -0.67 | -0.66 | -0.64 | -0.62 | -0.45 | -0.03 | 0.29  | 0.41  | 0.45   | 0.53   |
| GB                 | fixODI25    | -0.51 | -0.52 | -0.52 | -0.50 | -0.49 | -0.38 | -0.27 | -0.18 | -0.05 | 0.08   | 0.10   |
| MePDS              | fixODI25    | -0.63 | -0.62 | -0.61 | -0.62 | -0.60 | -0.55 | -0.43 | -0.26 | -0.12 | 0.04   | 0.20   |
| NSBII              | fixODI25    | -0.75 | -0.75 | -0.76 | -0.75 | -0.70 | -0.62 | -0.43 | -0.22 | -0.03 | 0.12   | 0.23   |
| NSBIII             | fixODI25    | -0.71 | -0.69 | -0.65 | -0.62 | -0.67 | -0.57 | -0.43 | -0.25 | -0.02 | 0.16   | 0.28   |
| ArkBB              | fixODI33    | -0.03 | 0.03  | 0.07  | 0.10  | 0.17  | 0.26  | 0.39  | 0.46  | 0.47  | 0.50   | 0.49   |
| FehBB              | fixODI33    | -0.59 | -0.58 | -0.56 | -0.54 | -0.53 | -0.43 | -0.03 | 0.12  | 0.14  | 0.20   | 0.32   |
| GB                 | fixODI33    | -0.41 | -0.41 | -0.42 | -0.42 | -0.53 | -0.51 | -0.39 | -0.19 | -0.01 | 0.07   | 0.07   |
| MePDS              | fixODI33    | -0.47 | -0.43 | -0.39 | -0.38 | -0.36 | -0.38 | -0.35 | -0.26 | -0.18 | -0.09  | 0.07   |
| NSBII              | fixODI33    | -0.68 | -0.70 | -0.72 | -0.73 | -0.72 | -0.66 | -0.50 | -0.31 | -0.13 | 0.08   | 0.27   |
| NSBIII             | fixODI33    | -0.72 | -0.71 | -0.67 | -0.65 | -0.73 | -0.64 | -0.49 | -0.29 | -0.05 | 0.15   | 0.28   |
| ArkBB              | fixODI33rev | -0.17 | -0.22 | -0.28 | -0.33 | -0.39 | -0.34 | -0.27 | -0.20 | -0.10 | 0.07   | 0.21   |
| FehBB              | fixODI33rev | -0.66 | -0.66 | -0.65 | -0.63 | -0.61 | -0.45 | -0.03 | 0.27  | 0.36  | 0.41   | 0.49   |
| GB                 | fixODI33rev | -0.49 | -0.50 | -0.50 | -0.49 | -0.50 | -0.40 | -0.29 | -0.18 | -0.04 | 0.08   | 0.10   |
| MePDS              | fixODI33rev | -0.61 | -0.59 | -0.57 | -0.57 | -0.56 | -0.52 | -0.42 | -0.27 | -0.14 | 0.01   | 0.17   |
| NSBII              | fixODI33rev | -0.74 | -0.74 | -0.76 | -0.75 | -0.71 | -0.63 | -0.44 | -0.23 | -0.05 | 0.12   | 0.24   |
| NSBIII             | fixODI33rev | -0.71 | -0.69 | -0.65 | -0.62 | -0.68 | -0.58 | -0.44 | -0.26 | -0.02 | 0.16   | 0.28   |
| ArkBB              | fixODIhalf  | -0.12 | -0.11 | -0.12 | -0.14 | -0.13 | -0.06 | 0.04  | 0.13  | 0.20  | 0.31   | 0.39   |
| FehBB              | fixODIhalf  | -0.64 | -0.64 | -0.62 | -0.60 | -0.59 | -0.45 | -0.03 | 0.21  | 0.25  | 0.31   | 0.41   |
| GB                 | fixODIhalf  | -0.46 | -0.47 | -0.47 | -0.46 | -0.52 | -0.45 | -0.34 | -0.19 | -0.03 | 0.08   | 0.08   |
| MePDS              | fixODIhalf  | -0.54 | -0.51 | -0.48 | -0.47 | -0.46 | -0.45 | -0.39 | -0.27 | -0.17 | -0.05  | 0.12   |
| NSBII              | fixODIhalf  | -0.72 | -0.73 | -0.74 | -0.74 | -0.71 | -0.64 | -0.47 | -0.26 | -0.08 | 0.10   | 0.25   |
| NSBIII             | fixODIhalf  | -0.72 | -0.70 | -0.66 | -0.64 | -0.71 | -0.61 | -0.47 | -0.28 | -0.04 | 0.16   | 0.28   |
| ArkBB              | ODI25       | 0.26  | 0.19  | 0.11  | 0.05  | -0.05 | -0.11 | -0.23 | -0.35 | -0.39 | -0.30  | -0.12  |
| FehBB              | ODI25       | -0.47 | -0.45 | -0.42 | -0.40 | -0.50 | -0.61 | -0.66 | -0.53 | -0.44 | -0.28  | 0.01   |
| GB                 | ODI25       | -0.13 | -0.18 | -0.23 | -0.28 | -0.43 | -0.52 | -0.58 | -0.51 | -0.26 | -0.03  | 0.02   |
| MePDS              | ODI25       | -0.26 | -0.26 | -0.26 | -0.28 | -0.35 | -0.46 | -0.49 | -0.51 | -0.45 | -0.33  | -0.14  |
| NSBII              | ODI25       | -0.58 | -0.60 | -0.62 | -0.63 | -0.66 | -0.67 | -0.61 | -0.54 | -0.36 | -0.20  | -0.07  |
| NSBIII             | ODI25       | -0.62 | -0.62 | -0.61 | -0.58 | -0.68 | -0.67 | -0.65 | -0.51 | -0.28 | -0.11  | 0.08   |
| ArkBB              | ODI25a      | 0.26  | 0.19  | 0.11  | 0.05  | -0.05 | -0.11 | -0.23 | -0.35 | -0.39 | -0.30  | -0.12  |
| FehBB              | ODI25a      | -0.47 | -0.45 | -0.42 | -0.40 | -0.50 | -0.61 | -0.66 | -0.53 | -0.44 | -0.28  | 0.01   |
| GB                 | ODI25a      | -0.13 | -0.18 | -0.23 | -0.28 | -0.43 | -0.52 | -0.58 | -0.51 | -0.26 | -0.03  | 0.02   |

|        |            |       |       |       |       |       |       |       |       |       |       |       |
|--------|------------|-------|-------|-------|-------|-------|-------|-------|-------|-------|-------|-------|
| MePDS  | ODI25a     | -0.26 | -0.26 | -0.26 | -0.28 | -0.35 | -0.46 | -0.49 | -0.51 | -0.45 | -0.33 | -0.14 |
| NSBII  | ODI25a     | -0.58 | -0.60 | -0.62 | -0.63 | -0.66 | -0.67 | -0.61 | -0.54 | -0.36 | -0.20 | -0.07 |
| NSBIII | ODI25a     | -0.62 | -0.62 | -0.61 | -0.58 | -0.68 | -0.67 | -0.65 | -0.51 | -0.28 | -0.11 | 0.08  |
| ArkBB  | ODI33      | 0.32  | 0.30  | 0.28  | 0.26  | 0.25  | 0.24  | 0.22  | 0.15  | 0.07  | 0.10  | 0.20  |
| FehBB  | ODI33      | -0.50 | -0.49 | -0.46 | -0.43 | -0.48 | -0.59 | -0.65 | -0.45 | -0.24 | -0.08 | 0.13  |
| GB     | ODI33      | -0.19 | -0.22 | -0.25 | -0.29 | -0.50 | -0.61 | -0.58 | -0.38 | -0.11 | 0.01  | 0.02  |
| MePDS  | ODI33      | -0.35 | -0.31 | -0.28 | -0.28 | -0.29 | -0.36 | -0.39 | -0.36 | -0.31 | -0.22 | -0.05 |
| NSBII  | ODI33      | -0.55 | -0.59 | -0.63 | -0.65 | -0.70 | -0.71 | -0.62 | -0.51 | -0.34 | -0.12 | 0.10  |
| NSBIII | ODI33      | -0.67 | -0.67 | -0.65 | -0.63 | -0.73 | -0.70 | -0.61 | -0.44 | -0.20 | 0.00  | 0.17  |
| ArkBB  | ODI33a     | 0.32  | 0.30  | 0.28  | 0.26  | 0.25  | 0.24  | 0.22  | 0.15  | 0.07  | 0.10  | 0.20  |
| FehBB  | ODI33a     | -0.50 | -0.49 | -0.46 | -0.43 | -0.48 | -0.59 | -0.65 | -0.45 | -0.24 | -0.08 | 0.13  |
| GB     | ODI33a     | -0.19 | -0.22 | -0.25 | -0.29 | -0.50 | -0.61 | -0.58 | -0.38 | -0.11 | 0.01  | 0.02  |
| MePDS  | ODI33a     | -0.35 | -0.31 | -0.28 | -0.28 | -0.29 | -0.36 | -0.39 | -0.36 | -0.31 | -0.22 | -0.05 |
| NSBII  | ODI33a     | -0.55 | -0.59 | -0.63 | -0.65 | -0.70 | -0.71 | -0.62 | -0.51 | -0.34 | -0.12 | 0.10  |
| NSBIII | ODI33a     | -0.67 | -0.67 | -0.65 | -0.63 | -0.73 | -0.70 | -0.61 | -0.44 | -0.20 | 0.00  | 0.17  |
| ArkBB  | ODI33rev   | 0.27  | 0.20  | 0.13  | 0.07  | -0.02 | -0.08 | -0.19 | -0.30 | -0.36 | -0.27 | -0.09 |
| FehBB  | ODI33rev   | -0.49 | -0.47 | -0.44 | -0.41 | -0.50 | -0.61 | -0.66 | -0.53 | -0.43 | -0.25 | 0.04  |
| GB     | ODI33rev   | -0.15 | -0.19 | -0.24 | -0.29 | -0.45 | -0.54 | -0.60 | -0.50 | -0.24 | -0.02 | 0.02  |
| MePDS  | ODI33rev   | -0.29 | -0.28 | -0.27 | -0.29 | -0.34 | -0.45 | -0.48 | -0.49 | -0.43 | -0.31 | -0.12 |
| NSBII  | ODI33rev   | -0.58 | -0.60 | -0.62 | -0.64 | -0.67 | -0.68 | -0.61 | -0.53 | -0.36 | -0.18 | -0.04 |
| NSBIII | ODI33rev   | -0.63 | -0.63 | -0.62 | -0.60 | -0.69 | -0.68 | -0.65 | -0.50 | -0.27 | -0.09 | 0.10  |
| ArkBB  | ODI33reva  | 0.27  | 0.20  | 0.13  | 0.07  | -0.02 | -0.08 | -0.19 | -0.30 | -0.36 | -0.27 | -0.09 |
| FehBB  | ODI33reva  | -0.49 | -0.47 | -0.44 | -0.41 | -0.50 | -0.61 | -0.66 | -0.53 | -0.43 | -0.25 | 0.04  |
| GB     | ODI33reva  | -0.15 | -0.19 | -0.24 | -0.29 | -0.45 | -0.54 | -0.60 | -0.50 | -0.24 | -0.02 | 0.02  |
| MePDS  | ODI33reva  | -0.29 | -0.28 | -0.27 | -0.29 | -0.34 | -0.45 | -0.48 | -0.49 | -0.43 | -0.31 | -0.12 |
| NSBII  | ODI33reva  | -0.58 | -0.60 | -0.62 | -0.64 | -0.67 | -0.68 | -0.61 | -0.53 | -0.36 | -0.18 | -0.04 |
| NSBIII | ODI33reva  | -0.63 | -0.63 | -0.62 | -0.60 | -0.69 | -0.68 | -0.65 | -0.50 | -0.27 | -0.09 | 0.10  |
| ArkBB  | ODIhalf    | 0.30  | 0.24  | 0.19  | 0.14  | 0.08  | 0.04  | -0.06 | -0.16 | -0.23 | -0.16 | 0.00  |
| FehBB  | ODIhalf    | -0.51 | -0.49 | -0.46 | -0.43 | -0.50 | -0.60 | -0.66 | -0.52 | -0.35 | -0.17 | 0.09  |
| GB     | ODIhalf    | -0.17 | -0.20 | -0.25 | -0.29 | -0.48 | -0.58 | -0.60 | -0.45 | -0.19 | -0.01 | 0.02  |
| MePDS  | ODIhalf    | -0.33 | -0.30 | -0.28 | -0.29 | -0.32 | -0.41 | -0.44 | -0.43 | -0.37 | -0.27 | -0.08 |
| NSBII  | ODIhalf    | -0.57 | -0.60 | -0.63 | -0.65 | -0.68 | -0.69 | -0.61 | -0.53 | -0.35 | -0.15 | 0.02  |
| NSBIII | ODIhalf    | -0.65 | -0.65 | -0.64 | -0.62 | -0.71 | -0.69 | -0.64 | -0.48 | -0.24 | -0.05 | 0.13  |
| ArkBB  | ODIhalfa   | 0.30  | 0.24  | 0.19  | 0.14  | 0.08  | 0.04  | -0.06 | -0.16 | -0.23 | -0.16 | 0.00  |
| FehBB  | ODIhalfa   | -0.51 | -0.49 | -0.46 | -0.43 | -0.50 | -0.60 | -0.66 | -0.52 | -0.35 | -0.17 | 0.09  |
| GB     | ODIhalfa   | -0.17 | -0.20 | -0.25 | -0.29 | -0.48 | -0.58 | -0.60 | -0.45 | -0.19 | -0.01 | 0.02  |
| MePDS  | ODIhalfa   | -0.33 | -0.30 | -0.28 | -0.29 | -0.32 | -0.41 | -0.44 | -0.43 | -0.37 | -0.27 | -0.08 |
| NSBII  | ODIhalfa   | -0.57 | -0.60 | -0.63 | -0.65 | -0.68 | -0.69 | -0.61 | -0.53 | -0.35 | -0.15 | 0.02  |
| NSBIII | ODIhalfa   | -0.65 | -0.65 | -0.64 | -0.62 | -0.71 | -0.69 | -0.64 | -0.48 | -0.24 | -0.05 | 0.13  |
| ArkBB  | seasODI25  | -0.38 | -0.45 | -0.52 | -0.58 | -0.63 | -0.57 | -0.52 | -0.49 | -0.41 | -0.26 | -0.10 |
| FehBB  | seasODI25  | -0.71 | -0.71 | -0.69 | -0.67 | -0.63 | -0.46 | -0.01 | 0.32  | 0.44  | 0.48  | 0.55  |
| GB     | seasODI25  | -0.50 | -0.50 | -0.49 | -0.47 | -0.48 | -0.39 | -0.28 | -0.18 | -0.03 | 0.10  | 0.11  |
| MePDS  | seasODI25  | -0.64 | -0.63 | -0.62 | -0.63 | -0.62 | -0.57 | -0.46 | -0.30 | -0.16 | 0.00  | 0.16  |
| NSBII  | seasODI25  | -0.73 | -0.74 | -0.76 | -0.75 | -0.69 | -0.59 | -0.39 | -0.19 | -0.01 | 0.14  | 0.26  |
| NSBIII | seasODI25  | -0.72 | -0.71 | -0.67 | -0.64 | -0.70 | -0.60 | -0.46 | -0.27 | -0.03 | 0.15  | 0.25  |
| ArkBB  | seasODI25a | -0.38 | -0.45 | -0.52 | -0.58 | -0.63 | -0.57 | -0.52 | -0.49 | -0.41 | -0.26 | -0.10 |
| FehBB  | seasODI25a | -0.71 | -0.71 | -0.69 | -0.67 | -0.63 | -0.46 | -0.01 | 0.32  | 0.44  | 0.48  | 0.55  |
| GB     | seasODI25a | -0.50 | -0.50 | -0.49 | -0.47 | -0.48 | -0.39 | -0.28 | -0.18 | -0.03 | 0.10  | 0.11  |
| MePDS  | seasODI25a | -0.64 | -0.63 | -0.62 | -0.63 | -0.62 | -0.57 | -0.46 | -0.30 | -0.16 | 0.00  | 0.16  |

|        |               |       |       |       |       |       |       |       |       |       |       |       |
|--------|---------------|-------|-------|-------|-------|-------|-------|-------|-------|-------|-------|-------|
| NSBII  | seasODI25a    | -0.73 | -0.74 | -0.76 | -0.75 | -0.69 | -0.59 | -0.39 | -0.19 | -0.01 | 0.14  | 0.26  |
| NSBIII | seasODI25a    | -0.72 | -0.71 | -0.67 | -0.64 | -0.70 | -0.60 | -0.46 | -0.27 | -0.03 | 0.15  | 0.25  |
| ArkBB  | seasODI33     | -0.38 | -0.39 | -0.41 | -0.44 | -0.44 | -0.35 | -0.25 | -0.18 | -0.11 | 0.03  | 0.14  |
| FehBB  | seasODI33     | -0.64 | -0.63 | -0.61 | -0.58 | -0.57 | -0.44 | -0.01 | 0.17  | 0.18  | 0.24  | 0.35  |
| GB     | seasODI33     | -0.38 | -0.38 | -0.38 | -0.39 | -0.52 | -0.54 | -0.41 | -0.19 | 0.00  | 0.07  | 0.07  |
| MePDS  | seasODI33     | -0.50 | -0.46 | -0.43 | -0.42 | -0.40 | -0.41 | -0.38 | -0.29 | -0.20 | -0.09 | 0.07  |
| NSBII  | seasODI33     | -0.64 | -0.67 | -0.71 | -0.72 | -0.71 | -0.65 | -0.49 | -0.31 | -0.14 | 0.08  | 0.29  |
| NSBIII | seasODI33     | -0.72 | -0.71 | -0.68 | -0.66 | -0.75 | -0.67 | -0.51 | -0.30 | -0.07 | 0.14  | 0.26  |
| ArkBB  | seasODI33a    | -0.38 | -0.39 | -0.41 | -0.44 | -0.44 | -0.35 | -0.25 | -0.18 | -0.11 | 0.03  | 0.14  |
| FehBB  | seasODI33a    | -0.64 | -0.63 | -0.61 | -0.58 | -0.57 | -0.44 | -0.01 | 0.17  | 0.18  | 0.24  | 0.35  |
| GB     | seasODI33a    | -0.38 | -0.38 | -0.38 | -0.39 | -0.52 | -0.54 | -0.41 | -0.19 | 0.00  | 0.07  | 0.07  |
| MePDS  | seasODI33a    | -0.50 | -0.46 | -0.43 | -0.42 | -0.40 | -0.41 | -0.38 | -0.29 | -0.20 | -0.09 | 0.07  |
| NSBII  | seasODI33a    | -0.64 | -0.67 | -0.71 | -0.72 | -0.71 | -0.65 | -0.49 | -0.31 | -0.14 | 0.08  | 0.29  |
| NSBIII | seasODI33a    | -0.72 | -0.71 | -0.68 | -0.66 | -0.75 | -0.67 | -0.51 | -0.30 | -0.07 | 0.14  | 0.26  |
| ArkBB  | seasODI33rev  | -0.39 | -0.45 | -0.52 | -0.57 | -0.62 | -0.56 | -0.50 | -0.47 | -0.39 | -0.24 | -0.08 |
| FehBB  | seasODI33rev  | -0.71 | -0.70 | -0.69 | -0.67 | -0.63 | -0.46 | -0.01 | 0.30  | 0.40  | 0.44  | 0.52  |
| GB     | seasODI33rev  | -0.48 | -0.48 | -0.48 | -0.46 | -0.50 | -0.42 | -0.31 | -0.18 | -0.02 | 0.10  | 0.11  |
| MePDS  | seasODI33rev  | -0.62 | -0.61 | -0.60 | -0.60 | -0.59 | -0.55 | -0.45 | -0.31 | -0.18 | -0.02 | 0.14  |
| NSBII  | seasODI33rev  | -0.71 | -0.73 | -0.75 | -0.75 | -0.69 | -0.60 | -0.41 | -0.21 | -0.03 | 0.13  | 0.27  |
| NSBIII | seasODI33rev  | -0.72 | -0.71 | -0.67 | -0.65 | -0.71 | -0.62 | -0.47 | -0.27 | -0.04 | 0.15  | 0.26  |
| ArkBB  | seasODI33reva | -0.39 | -0.45 | -0.52 | -0.57 | -0.62 | -0.56 | -0.50 | -0.47 | -0.39 | -0.24 | -0.08 |
| FehBB  | seasODI33reva | -0.71 | -0.70 | -0.69 | -0.67 | -0.63 | -0.46 | -0.01 | 0.30  | 0.40  | 0.44  | 0.52  |
| GB     | seasODI33reva | -0.48 | -0.48 | -0.48 | -0.46 | -0.50 | -0.42 | -0.31 | -0.18 | -0.02 | 0.10  | 0.11  |
| MePDS  | seasODI33reva | -0.62 | -0.61 | -0.60 | -0.60 | -0.59 | -0.55 | -0.45 | -0.31 | -0.18 | -0.02 | 0.14  |
| NSBII  | seasODI33reva | -0.71 | -0.73 | -0.75 | -0.75 | -0.69 | -0.60 | -0.41 | -0.21 | -0.03 | 0.13  | 0.27  |
| NSBIII | seasODI33reva | -0.72 | -0.71 | -0.67 | -0.65 | -0.71 | -0.62 | -0.47 | -0.27 | -0.04 | 0.15  | 0.26  |
| ArkBB  | seasODIhalf   | -0.40 | -0.45 | -0.50 | -0.55 | -0.58 | -0.50 | -0.44 | -0.38 | -0.31 | -0.16 | -0.01 |
| FehBB  | seasODIhalf   | -0.69 | -0.68 | -0.66 | -0.64 | -0.61 | -0.45 | -0.01 | 0.25  | 0.30  | 0.35  | 0.44  |
| GB     | seasODIhalf   | -0.44 | -0.44 | -0.44 | -0.43 | -0.51 | -0.48 | -0.36 | -0.19 | -0.01 | 0.09  | 0.09  |
| MePDS  | seasODIhalf   | -0.57 | -0.54 | -0.52 | -0.51 | -0.50 | -0.49 | -0.43 | -0.31 | -0.19 | -0.06 | 0.11  |
| NSBII  | seasODIhalf   | -0.68 | -0.71 | -0.73 | -0.74 | -0.70 | -0.62 | -0.45 | -0.25 | -0.08 | 0.11  | 0.28  |
| NSBIII | seasODIhalf   | -0.72 | -0.71 | -0.68 | -0.66 | -0.73 | -0.64 | -0.49 | -0.29 | -0.05 | 0.15  | 0.26  |
| ArkBB  | seasODIhalfa  | -0.40 | -0.45 | -0.50 | -0.55 | -0.58 | -0.50 | -0.44 | -0.38 | -0.31 | -0.16 | -0.01 |
| FehBB  | seasODIhalfa  | -0.69 | -0.68 | -0.66 | -0.64 | -0.61 | -0.45 | -0.01 | 0.25  | 0.30  | 0.35  | 0.44  |
| GB     | seasODIhalfa  | -0.44 | -0.44 | -0.44 | -0.43 | -0.51 | -0.48 | -0.36 | -0.19 | -0.01 | 0.09  | 0.09  |
| MePDS  | seasODIhalfa  | -0.57 | -0.54 | -0.52 | -0.51 | -0.50 | -0.49 | -0.43 | -0.31 | -0.19 | -0.06 | 0.11  |
| NSBII  | seasODIhalfa  | -0.68 | -0.71 | -0.73 | -0.74 | -0.70 | -0.62 | -0.45 | -0.25 | -0.08 | 0.11  | 0.28  |
| NSBIII | seasODIhalfa  | -0.72 | -0.71 | -0.68 | -0.66 | -0.73 | -0.64 | -0.49 | -0.29 | -0.05 | 0.15  | 0.26  |

References:

MARNET: Oceanographic data from North West Shelf and from the Baltic Sea, dod@bsh.de [dataset], 2018-2023.
