# Supplementary material for: The oxygen deficiency index blueprint allows an economic and quick scan via baseline assessment for forecasting the risk of seasonal oxygen deficiency in the North and Baltic Seas
Source: Copernicus journal article supplement (doi:10.5194/egusphere-2023-3092), 2024-01-17
Supplement: Supplementary file [file egusphere-2023-3092-AC7-supplement.pdf]

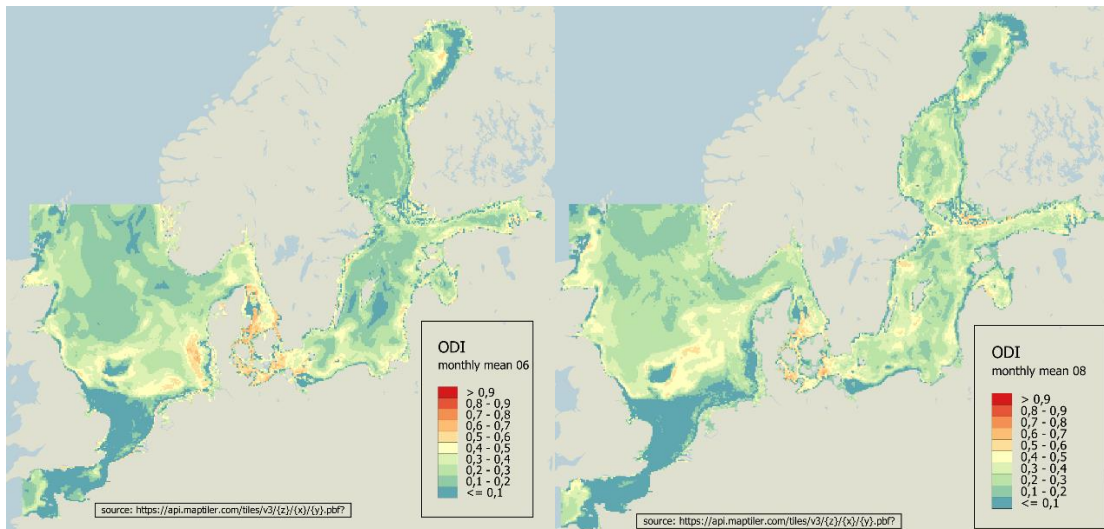

Figure 2e: monthly mean Oxygen Deficiency Index

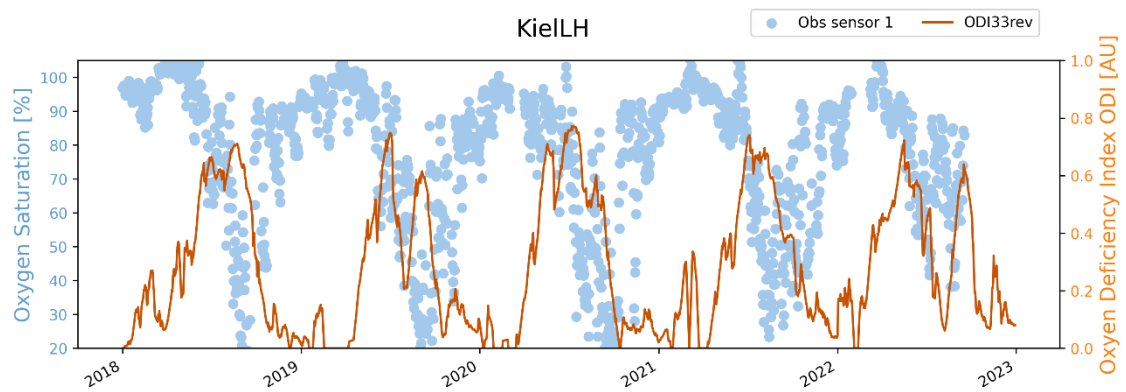

Figure 6d: Comparison of daily averaged oxygen saturations at deepest sensor depths (sensor1) and modelled bottom oxygen saturation (at the deepest depth layer of the model) with the Oxygen Deficiency Index (ODI) over five years; Timeseries starts at 1<sup>st</sup> January 2018 and ends 31<sup>st</sup> December 2022;
